1

2

## **Whole Genome Sequencing and Rare Variant Analysis in Essential Tremor**

3

### **Families**

4

5

Zagaa Odgerel<sup>1</sup>, Nora Hernandez<sup>2</sup>, Jemin Park<sup>2</sup>, Ruth Ottman<sup>3,4,5,6</sup>, Elan D. Louis<sup>2</sup> and

6

Lorraine N. Clark<sup>1,7</sup>

7

8

9

<sup>1</sup>Department of Pathology and Cell Biology, College of Physicians and Surgeons,

10

Columbia University New York NY 10032 USA.

11

<sup>2</sup>Department of Neurology, Yale School of Medicine, Yale University, New Haven, CT

12

06510, USA; Department of Chronic Disease Epidemiology, Yale School of Public

13

Health, New Haven, CT 06510, USA.

14

<sup>3</sup>G.H Sergievsky Center, Columbia University, New York, NY 10032 USA.

15

<sup>4</sup>Department of Neurology, College of Physicians and Surgeons, Columbia University

16

New York, NY 10032 USA.

17

<sup>5</sup>Department of Epidemiology, Mailman School of Public Health, Columbia University,

18

NY 10032 USA.

19

<sup>6</sup>Division of Epidemiology, New York State Psychiatric Institute, New York NY 10032

20

USA.

21

<sup>7</sup>Taub Institute for Research on Alzheimer's Disease and the Aging Brain, College of

22

Physicians and Surgeons, Columbia University, New York, NY 10032 USA.

23

24

25

26

27 **\*Correspondence:** Dr. Lorraine Clark, College of Physicians and Surgeons Building,  
28 Room 420A, Department of Pathology and Cell Biology, 650 West 168<sup>th</sup> Street, New  
29 York, NY 10032 USA.

30 Tel: (212) 304-5268

31 Email: [lc654@cumc.columbia.edu](mailto:lc654@cumc.columbia.edu)

32

33 **Running Title:** WGS and rare variants in ET families

34

35 *Conflict of Interest Statement.* The authors have no conflict of interest.

36

37 **ABSTRACT**

38 Essential tremor (ET) is one of the most common movement disorders. The etiology of  
39 ET remains largely unexplained. Whole genome sequencing (WGS) is likely to be of  
40 value in understanding a large proportion of ET with Mendelian and complex disease  
41 inheritance patterns. In ET families with Mendelian inheritance patterns, WGS may lead  
42 to gene identification where WES analysis failed to identify the causative variant due to  
43 incomplete coverage of the entire coding region of the genome. Alternatively, in ET  
44 families with complex disease inheritance patterns with gene x gene and gene x  
45 environment interactions enrichment of functional rare coding and non-coding variants  
46 may explain the heritability of ET. We performed WGS in eight ET families (n=40  
47 individuals) enrolled in the Family Study of Essential Tremor. The analysis included  
48 filtering WGS data based on allele frequency in population databases, rare variant  
49 classification and association testing using the Mixed-Model Kernel Based Adaptive  
50 Cluster (MM-KBAC) test and prioritization of candidate genes identified within families  
51 using phenolyzer. WGS analysis identified candidate genes for ET in 5/8 (62.5%) of the  
52 families analyzed. WES analysis in a subset of these families in our previously published  
53 study failed to identify candidate genes. In one family, we identified a deleterious and  
54 damaging variant (c.1367G>A, p.(Arg456Gln)) in the candidate gene, *CACNA1G*, which  
55 encodes the pore forming subunit of T-type Ca(2+) channels, Ca<sub>v</sub>3.1, and is expressed  
56 in various motor pathways and has been previously implicated in neuronal  
57 autorhythmicity and ET. Other candidate genes identified include *SLIT3* (family D), which  
58 encodes an axon guidance molecule and in three families, phenolyzer prioritized genes  
59 that are associated with hereditary neuropathies (family A, *KARS*, family B, *KIF5A* and  
60 family F, *NTRK1*). This work has identified candidate genes and pathways for ET that  
61 can now be prioritized for functional studies.

62

## 63 INTRODUCTION

64 Essential tremor (ET) is one of the most common neurological disorders. In most studies  
65 the prevalence of ET is markedly higher than that of Parkinson's disease (PD). The  
66 prevalence of ET is estimated to be 2.2% and as much as 4.6% in cases aged  $\geq 65$  years  
67 [1]. The defining clinical feature of ET is a kinetic tremor at 4-12 Hz. This tremor occurs  
68 in the arms and hands; it may also eventually spread to involve several cranial regions  
69 (e.g., the neck, voice, and jaw). Both genetic and environmental (i.e., toxic) factors are  
70 likely to contribute to the etiology of ET. The high heritability and aggregation of ET in  
71 families suggests a Mendelian pattern of inheritance [2-5]. Family studies indicate that  
72 on the order of 30 - 70% of ET patients have a family history with the vast majority  
73 (>80%) of young-onset (<40 years old) cases reporting >1 affected first-degree relative  
74 [6].

75 Four published genome wide linkage scans have been performed all in North American  
76 or Icelandic ET families [7-9] . These studies led to the identification of genetic loci  
77 harboring ET genes on chromosomes 3q13 (ETM1 OMIM:190300) [7] , 2p22-p25 (ETM2  
78 OMIM:602134) [8] , 6p23 (ETM3 OMIM: 611456) [9] , and 5q35 [10] . Recently, several  
79 studies have used a whole exome sequencing (WES) approach to identify candidate  
80 genes in ET families [11-16]. Collectively, these studies suggest that ET is genetically  
81 heterogeneous.

82 With the limited nature of this progress, the genetic etiology of ET still remains largely  
83 unexplained. Whole genome sequencing (WGS) is likely to be of value in furthering our  
84 understanding of a large proportion of ET where WES analysis has failed to identify the  
85 causative variant [17]. WGS which forgoes capturing is less sensitive to GC content and  
86 is more likely than WES to provide complete coverage of the entire coding region of the  
87 genome [18].

88 Here we report analysis of eight early-onset ET families (n=40 individuals) enrolled in the  
89 family study of Essential Tremor (FASET) at Columbia University. The analysis included  
90 filtering on WGS data based on allele frequency in population databases, rare variant  
91 classification and association using the Mixed-Model Kernel Based Adaptive Cluster  
92 (MM-KBAC) test [19, 20] , and prioritization of candidate genes identified within families  
93 using phenolyzer.

94

## 95 **MATERIALS AND METHODS**

### 96 **Study participants and clinical diagnosis**

97 Study subjects and relatives were enrolled in a family study of ET at Columbia University  
98 NY, USA. The study was approved by the Institutional Review Board at Columbia  
99 University and written informed consent was obtained from all participants. Details of the  
100 study, criteria for enrollment, and diagnosis of ET has been described previously [15].

101 We selected a total of 8 families for WGS (n=40 individuals), which included affected and  
102 unaffected first-degree relatives. The eight families have been previously described in a  
103 WES study [15]. All affected individuals included in the study received a diagnosis of  
104 definite, probable or possible ET. Possible and probable ET family members were  
105 considered affected. The criteria we used, namely, the Washington Heights Inwood  
106 Genetic Study of ET (WHIGET) criteria are very strict [21]. All ET diagnoses (possible,  
107 probable and definite) required, at a minimum, moderate or greater amplitude kinetic  
108 tremor on at least three tasks, and an absence of other etiologies. As such, these criteria  
109 for all three categories of ET (i.e., possible, probable and definite) are even more  
110 stringent than those for definite ET that were outlined in the original Consensus  
111 Statement on Tremor of the Movement Disorders Society (published in 1998) [22] and  
112 the revised Consensus Criteria (published in 2017) [23]. The clinical characteristics of

113 study participants are summarized in Table 1 and pedigrees of the families are shown in  
114 Fig 1.

115

### 116 **Whole Genome Sequencing and quality control**

117 Genomic DNA was isolated from peripheral blood cells using standard methods. Whole  
118 genome sequencing was performed on the genomic DNA of 4-5 individuals including  
119 affected and unaffected (definite, probable or possible ET diagnosis) individuals from  
120 each of eight families. The pedigrees of eight families are shown in Fig.1. Libraries were  
121 prepared using the TruSeq DNA PCR-free kit (Illumina San Diego CA USA). Paired-end  
122 sequencing (2x150 bp) was performed at >30x coverage per sample. Resulting libraries  
123 were sequenced on Illumina HiSeq TENx (Illumina San Diego CA). Sequence alignment  
124 to the UCSC hg19 reference genome was performed using the Burrows-Wheeler Aligner  
125 algorithm [24] and variant calling was performed using the Genome Analysis Toolkit  
126 (GATK; Broad Institute Cambridge MA USA) [25] . Duplicate reads were removed using  
127 Picard (<http://broadinstitute.github.io/picard/>). Local realignment and quality recalibration  
128 was performed via GATK. Quality control checks for samples were performed according  
129 to GATK best practices.

### 130 **Variant filtering based on allele frequency in population databases**

131 We filtered and removed variants with  $MAF \geq 0.01$  in all individuals in 1000 Genomes  
132 Phase 3 or the NCBI dbSNP common 147 database, resulting in a total of 3,777,271  
133 rare variants across all samples.

#### 134 *Classification of rare variants based on variant type*

135 Assessment of variants was performed based on reference sequence GRCh37 and  
136 RefSeq Gene transcripts of NCBI Homo sapiens Annotation Release 105 that was  
137 implemented in the Golden Helix SNP & Variation Suite (SVS) ver.8.2 (Golden Helix  
138 MT). Rare variants were classified into five groups, based on localization to a gene

139 region and predicted effect on transcript and protein: 1) 5'-UTR and 3'-UTR (n=26,872  
140 variants in 8,299 genes), 2) nonsynonymous (n=11,272 variants in 4,877 genes), 3)  
141 loss-of-function (LoF) (n=1,365 variants in 711 genes), 4) synonymous (n=5,854 variants  
142 in 3,164 genes), and 5) intronic (n=1,174,082 variants in 16,486 genes). LoF variants  
143 were defined as follows: nonsense variants that introduce stop gain/loss of codons,  
144 variants that disrupt splice sites including canonical splice donor and acceptor sites and  
145 frameshift variants that disrupt a transcript's open reading frame.

146

#### 147 **Annotation of Variants**

148 Rare variants were assessed using several *in silico* tools including the Combined  
149 Annotation Dependent Depletion (CADD) tool [26] implemented in the Golden Helix  
150 SNP & Variation Suite (SVS) ver.8.6.0 (Golden Helix MT). CADD measures  
151 deleteriousness of variants (coding and non-coding intronic) that is a property strongly  
152 correlated with molecular functionality and pathogenicity [27]. Variants were filtered  
153 based on a phred-scaled CADD score and variants with a phred-scaled CADD  
154 score>10, corresponding to the top 10% of deleterious substitutions relative to all  
155 possible variants in the human reference genome [26] were retained for further  
156 analyses. We also assessed deleteriousness of variants using several *in silico* tools  
157 including SIFT [28] , PolyPhen2 [29] , LRT [30] , Mutation Taster [31] , FATHMM [32] ,  
158 PROVEAN [33] , MetaSVM and MetaLR [34] as implemented in the Golden Helix SNP  
159 & Variation Suite (SVS) ver.8.6.0 (Golden Helix MT). Only variants with a phred-scaled  
160 CADD score>10 and/or predicted to be deleterious or damaging by  $\geq 1$  *in silico* prediction  
161 tool were retained for further analysis.

162

163 *Synonymous variants in splicing regulatory regions*

164 To determine whether synonymous variants identified in our analyses are enriched in  
165 splicing enhancer regions and splicing silencer regions we used  
166 <http://genes.mit.edu/burgelab/rescue-ese/> and <http://genes.mit.edu/fas-ess/> online tools,  
167 respectively [35, 36].

168 *Non-coding intronic variants in DNase I hypersensitivity and transcription factor binding*  
169 *sites*

170  
171 We performed further evaluation of non-coding intronic variants by assessing whether  
172 these variants are enriched in DNase I hypersensitive sites that represent open  
173 chromatin regions accessible to transcription factors. We downloaded the  
174 wgEncodeRegDnaseClusteredV3 table from the DNase Clusters track which contains  
175 DNase I Hypersensitive Sites in 125 cell types in ENCODE ([http://genome.ucsc.edu/cgi-](http://genome.ucsc.edu/cgi-bin/hgTables)  
176 [bin/hgTables](http://genome.ucsc.edu/cgi-bin/hgTables)) [37].

177 *Residual Variation Intolerance Score (RVIS)*

178  
179 We assessed the candidate genes identified in this study to determine whether they are  
180 intolerant to variants by applying the residual variation intolerance score (RVIS) [38].

181

## 182 **MM-KBAC Analysis**

183 We performed a rare variant classification and association analysis using the  
184 regression and permutation based Mixed-Model Kernel-Based Adaptive Cluster method  
185 (MM-KBAC) [19], and the within gene interaction model to analyze rare functional  
186 variants, as implemented in SVS ver.8.6.0 (Golden Helix MT). KBAC catalogs rare  
187 variant data within a gene region/transcript (genome-wide) into multi-marker genotypes  
188 and determines their association with the phenotype, weighing each multi-marker  
189 genotype by how often that genotype was expected to occur according to control and  
190 case data and the null hypothesis that there is no association between the genotype and



191 the case/control status. Thus, genotypes with high sample risks are given higher weights  
192 that potentially separate causal from non-causal genotypes. The logistic mixed model  
193 approach for KBAC to adjust for family structure and relatedness was used and has  
194 been described previously [20]. Possible and probable ET family members were  
195 considered affected. The control population used included unaffected family members. A  
196  $p$  value was assessed by an adaptive permutation procedure in association tests [19].  
197 The test applied 10 000 permutations and an adaptive permutation threshold of alpha  
198 0.01 and used the earliest start position and the last stop position of all transcripts to  
199 define a gene based on the RefSeq Gene transcripts 105v2 NCBI. By default, variants  
200 flanking (proximal and distal) the gene region up to a distance of 1000 bp were included  
201 in the analysis. We selected genes with a  $p$  value <0.05 for further analysis.

202 The analysis was performed separately for variants classified by variant type in the  
203 dataset. When MM-KBAC analysis was performed separately for variants based on  
204 variant type (nonsynonymous, LoF, 5'UTR and 3'UTR, synonymous and intronic) the  
205 total number of genes with  $p$  value <0.05 was 163.

206

### 207 **Co-segregation of variants with ET within families**

208 Variants identified from the MM-KBAC analysis, that were annotated with a phred scaled  
209 score >10 by CADD (coding and non-coding intronic variants) and/or predicted by *in*  
210 *silico* prediction tools to be deleterious or damaging (coding variants) were assessed for  
211 co-segregation with ET within families. The criteria that we used to define co-segregation  
212 is as follows: 1) the annotated variant was present in all affected ET individuals and 2)  
213 absent from unaffected individuals within a family.

214 Sanger sequencing was used to validate and confirm variants within a family and to  
215 genotype family members with available DNA that did not have WGS data.

216

217 Genes harboring variants that were annotated with a phred scaled score>10 by CADD  
218 (coding and non-coding intronic variants) and/or predicted by *in silico* prediction tools to  
219 be deleterious or damaging (coding variants) and that co-segregated with ET within  
220 single family were prioritized for phenolyzer.

221

### 222 **Prioritization of Candidate Genes using Phenolyzer**

223 Phenolyzer is a computational tool that uses prior information to implicate genes  
224 involved in diseases [39]. Phenolyzer exhibits superior performance over competing  
225 methods for prioritizing Mendelian and complex disease genes based on disease or  
226 phenotype terms entered as free text. The most disease relevant genes, considering all  
227 reported gene-disease relationships, are shown as seed genes. Predicted genes are  
228 input (seed) genes that are expanded to include related genes on the basis of several  
229 gene-gene relationships (e.g. protein-protein interactions, biological pathway, gene  
230 family or transcriptional regulation). The following disease/phenotype terms were used:  
231 Tremor, Essential Tremor, Parkinson's disease, Channelopathy, Epilepsy, neurological,  
232 neurodegenerative, Spinocerebellar ataxia, Fragile X Associated Tremor Ataxia  
233 Syndrome, brain, cerebellar diseases. For each family, candidate genes with prioritized  
234 variants were uploaded as input for phenolyzer analysis. The gene disease score and  
235 gene prediction score system is described in Yang et al., 2015 [39]. Phenolyzer  
236 generates raw and normalized scores for seed and predicted genes [39].

237

238

### 239 **Availability of Data**

240 All phenotype and whole genome sequence data generated from this study will be  
241 released and deposited in the database of Genotypes and Phenotypes (dbGaP;  
242 <http://www.nlm.nih.gov/gap>) of the National Center for Biotechnology Information. The

243 study titled ‘Identification of Susceptibility Genes for Essential Tremor’ received the  
 244 dbGaP Study Accession: phs000966.v1.p1. Additionally, all deidentified WGS data and  
 245 related meta data underlying the findings reported in this manuscript will be made  
 246 available at the public repository Dryad (datadryad.org).

247

## 248 RESULTS

249 To identify candidate genes in ET we conducted WGS in 40 individuals from 8 families  
 250 with multiple affected ET members (Table 1 and Fig.1). Datasets were generated based  
 251 on filtering of variants on allele frequency in population databases (Fig. 2). To identify  
 252 and prioritize genes in the ET families we performed rare variant classification and  
 253 association analysis using the Mixed-Model Kernel Based Adaptive Cluster (MM-KBAC)  
 254 test [19] followed by phenolyzer [39].

255

256 **Table 1 Clinical characteristics of affected ET individuals and unaffected family**  
 257 **members that were whole genome sequenced in eight families**

258

| Clinical characteristic             | ET patients<br>n=31 | Unaffected<br>n=9 | Total<br>n=40 |
|-------------------------------------|---------------------|-------------------|---------------|
| Male n (%)                          | 12 (39)             | 3 (33)            | 15 (38)       |
| Age at tremor onset mean years (SD) | 27.83 (19.30)       | NA                | NA            |
| Age at interview mean years, SD     | 58 (18.08)          | 56.63 (13.65)     | 57.72 (17.11) |
| Duration of tremor mean years, SD   | 30.47 (18.98)       | NA                | NA            |
| Total tremor score mean SD          | 17.76±7.80 (39)     | NA                | NA            |
| Head tremor on examination n (%)    | 12 (39)             | NA                | NA            |
| Chin tremor on examination n (%)    | 6 (19)              | NA                | NA            |
| Head tremor presence in head        | 4 (13)              | NA                | NA            |

|                |  |  |  |
|----------------|--|--|--|
| and chin n (%) |  |  |  |
|----------------|--|--|--|

259

260 **Figure 1 Pedigrees of eight ET families that were whole genome sequenced**

261

262 Pedigrees for families (A-H) that were whole genome sequenced are shown. The  
263 generation in each pedigree is shown by roman numerals. The proband is indicated by  
264 an arrowhead. A ‘\*’ symbol indicates subjects that were whole genome sequenced.  
265 Below each subject with DNA available for genetic analysis the subject ID is indicated.  
266 Symbol shading is as follows: definite ET, symbols completely black; probable ET,  
267 symbols half vertical black fill; possible ET, symbols with a quadrant in black; and  
268 unaffected clear symbol. To protect the identity of participants in families the gender and  
269 birth order were changed in order to disguise their identities.

270 **Figure 2 Analysis workflow for analysis using MM-KBAC**

271 The analysis workflow for WGS data is shown with population database filtering,  
272 analysis methods and annotation.

273

274 **Rare Variant Classification and Association Analysis of rare variants with**

275 **MAF<sub>≤</sub>0.01**

276 After QC and variant filtering, a total of 3,777,271 variants were selected for the  
277 subsequent analyses (Fig. 2). By MM-KBAC analysis, we obtained 1,325 genes with *p*  
278 value<0.05 (with-in gene association) and 3,779 variants located within these genes. Of  
279 those, 783 variants were annotated with a phred scaled score>10 by CADD and 95  
280 variants were predicted by *in silico* prediction tools to be deleterious or damaging.  
281 We assessed the following variant types: 1) nonsynonymous, 2) LoF, 3) 5'UTR and  
282 3'UTR, 4) synonymous and 5) intronic variants. Variants identified from the MM-KBAC  
283 analysis, that were annotated with a phred scaled score>10 by CADD and/or predicted  
284 by *in silico* prediction tools to be deleterious or damaging and that co-segregated within

285 the ET families are shown in Table 2. A total of 168 variants located in 163 genes co-  
286 segregated with ET within families.



|    |           |   |   |                   |                                                                                                   |                                |   |
|----|-----------|---|---|-------------------|---------------------------------------------------------------------------------------------------|--------------------------------|---|
| 1  | 98205947  | C | T | <i>DPYD</i>       | <i>NM_000110.3:c.321+1G&gt;A</i>                                                                  |                                | B |
| 9  | 130272601 | G | C | <i>FAM129B</i>    | <i>NM_022833.2:c.985C&gt;G</i>                                                                    | p.(Pro329Ala) (NP_073744.2)    | B |
| 12 | 49943258  | G | A | <i>KCNH3</i>      | <i>NM_012284.1:c.1503G&gt;A</i>                                                                   | p.(Thr501=) (NP_036416.1)      | B |
| 12 | 57975211  | G | A | <i>KIF5A</i>      | <i>NM_004984.2:c.2769G&gt;A</i>                                                                   | p.(Arg923=) (NP_004975.2)      | B |
| 12 | 53008439  | G | A | <i>KRT73</i>      | <i>NM_175068.2:c.743C&gt;T</i>                                                                    | p.(Thr248Met) (NP_778238.1)    | B |
| 8  | 23177415  | C | G | <i>LOXL2</i>      | <i>NM_002318.2:c.1453G&gt;C</i>                                                                   | p.(Ala485Pro) (NP_002309.1)    | B |
| 5  | 1477557   | G | A | <i>LPCAT1</i>     | <i>NM_024830.3:c.861C&gt;T</i>                                                                    | p.(Pro287=) (NP_079106.3)      | B |
| 16 | 58537777  | A | G | <i>NDRG4</i>      | <i>NM_001130487.1:c.253A&gt;G</i>                                                                 | p.(Ile85Val) (NP_001123959.1)  | B |
| 2  | 131221215 | T | A | <i>POTEI</i>      | <i>NM_001277406.1:c.2402A&gt;T</i>                                                                | p.(His801Leu) (NP_001264335.1) | B |
| 2  | 113940482 | C | T | <i>PSD4</i>       | <i>NM_012455.2:c.449C&gt;T</i>                                                                    | p.(Thr150Met) (NP_036587.2)    | B |
| 19 | 2251466   | C | T | <i>AMH</i>        | <i>NM_000479.3:c.1193C&gt;T</i>                                                                   | p.(Pro398Leu) (NP_000470.2)    | C |
| 18 | 55362414  | - | A | <i>ATP8B1</i>     | <i>NM_005603.4:c.929dupT</i>                                                                      | p.(Ile311fs) (NP_005594.1)     | C |
| 7  | 107112470 | C | T | <i>COG5/GPR22</i> | <i>NC_000007.13</i><br><i>(NM_006348.3):c.631+55212G&gt;A</i><br><i>(NM_005295.2):c.304C&lt;T</i> |                                | C |
| 3  | 148552329 | C | T | <i>CPB1</i>       | <i>NM_001871.2:c.192C&gt;T</i>                                                                    | p.(His64=) (NP_001862.2)       | C |
| 2  | 70524477  | G | C | <i>FAM136A</i>    | <i>NM_032833.2:c.361C&gt;G</i>                                                                    | p.(Leu121Val) (NP_116211.2)    | C |
| 8  | 33229632  | C | T | <i>FUT10</i>      | <i>NM_032664.3:c.*463G&gt;A</i>                                                                   |                                | C |
| 19 | 35645021  | C | T | <i>FXVD7</i>      | <i>NM_022006.1:c.*202C&gt;T</i>                                                                   |                                | C |
| 4  | 6864479   | C | T | <i>KIAA0232</i>   | <i>NM_014743.2:c.2370C&gt;T</i>                                                                   | p.(Ser790=) (NP_055558.2)      | C |
| 7  | 98792785  | T | A | <i>KPNA7</i>      | <i>NM_001145715.1:c.461A&gt;T</i>                                                                 | p.(Glu154Val) (NP_001139187.1) | C |
| 19 | 3786257   | G | A | <i>MATK</i>       | <i>NC_000019.9</i><br><i>(NM_002378.3):c.76-1375C&gt;T</i>                                        |                                | C |
| 8  | 16012594  | G | A | <i>MSR1</i>       | <i>NM_138715.2:c.877C&gt;T</i>                                                                    | p.(Arg293Ter) (NP_619729.1)    | C |
| 15 | 23014502  | C | T | <i>NIPA2</i>      | <i>NM_030922.6:c.223G&gt;A</i>                                                                    | p.(Ala75Thr) (NP_112184.4)     | C |
| 3  | 135721907 | A | G | <i>PPP2R3A</i>    | <i>NM_002718.4:c.1567A&gt;G</i>                                                                   | p.(Met523Val) (NP_002709.2)    | C |
| 17 | 45992740  | G | A | <i>SP2</i>        | <i>NM_003110.5:c.70G&gt;A</i>                                                                     | p.(Ala24Thr) (NP_003101.3)     | C |
| 17 | 43922409  | A | G | <i>SPPL2C</i>     | <i>NM_175882.2:c.137A&gt;G</i>                                                                    | p.(Tyr46Cys) (NP_787078.2)     | C |
| 6  | 144508380 | G | A | <i>STX11</i>      | <i>c.616G&gt;A (NM_003764.3)</i>                                                                  | p.(Glu206Lys) (NP_003755.2)    | C |

|    |           |              |   |                 |                                                                                                 |                                |   |
|----|-----------|--------------|---|-----------------|-------------------------------------------------------------------------------------------------|--------------------------------|---|
| 7  | 27809333  | G            | A | <i>TAX1BP1</i>  | <i>NM_006024.6:c.492G&gt;A</i>                                                                  | p.(Leu164=) (NP_006015.4)      | C |
| 12 | 101685524 | C            | T | <i>UTP20</i>    | <i>NM_014503.2:c.896C&gt;T</i>                                                                  | p.(Ser299Leu) (NP_055318.2)    | C |
| 12 | 118533479 | G            | A | <i>VSIG10</i>   | <i>NM_019086.5:c.220C&gt;T</i>                                                                  | p.(Arg74Trp) (NP_061959.2)     | C |
| 17 | 44950096  | C            | T | <i>WNT9B</i>    | <i>NM_003396.1:c.291C&gt;T</i>                                                                  | p.(Arg97Arg) (NP_003387.1)     | C |
| 5  | 179105676 | C            | T | <i>CBY3</i>     | <i>NM_001164444.1:c.637G&gt;A</i>                                                               | p.(Ala213Thr) (NP_001157916.1) | D |
| 20 | 56096790  | G            | A | <i>CTCF</i>     | <i>NC_000020.10</i><br><i>(NM_001269043.1):c.754+1334C&gt;T</i>                                 |                                | D |
| 9  | 140611424 | C            | T | <i>EHMT1</i>    | <i>NM_024757.4:c.432C&gt;T</i>                                                                  | p.(Ala144=) (NP_079033.4)      | D |
| 3  | 184290726 | C            | T | <i>EPHB3</i>    | <i>NM_004443.3:c.618C&gt;T</i>                                                                  | p.(Arg206=) (NP_004434.2)      | D |
| 14 | 100118616 | T            | C | <i>HHLPL1</i>   | <i>NM_001127258.1:c.311T&gt;C</i>                                                               | p.(Leu104Pro) (NP_001120730.1) | D |
| 17 | 9143279   | G            | A | <i>NTN1</i>     | <i>NM_004822.2:c.1809G&gt;A</i>                                                                 | p.(Lys603=) (NP_004813.2)      | D |
| 8  | 68972914  | C            | T | <i>PREX2</i>    | <i>NM_024870.2:c.1239C&gt;T</i>                                                                 | p.(Ser413=) (NP_079146.2)      | D |
| 6  | 110759925 | G            | - | <i>SLC22A16</i> | <i>NM_033125.3:c.1309delC</i>                                                                   | p.(Gln437fs) (NP_149116.2)     | D |
| 5  | 168112742 | C            | G | <i>SLIT3</i>    | <i>NM_001271946.1:c.3526G&gt;C</i>                                                              | p.(Val1176Leu)(NP_001258875.1) | D |
| 3  | 185211778 | -            | C | <i>TMEM41A</i>  | <i>NC_000003.11</i><br><i>(NM_080652.3):c.574+633dupG</i>                                       |                                | D |
| 9  | 139820182 | C            | T | <i>TRAF2</i>    | <i>NM_021138.3:c.1335C&gt;T</i>                                                                 | p.(Asp445=) (NP_066961.2)      | D |
| 3  | 180320969 | G            | A | <i>TTC14</i>    | <i>NM_133462.3:c.344G&gt;A</i>                                                                  | p.(Arg115Gln) (NP_597719.1)    | D |
| 17 | 67039819  | G            | T | <i>ABCA9</i>    | <i>NM_080283.3:c.611C&gt;A</i>                                                                  | p.(Ser204Ter) (NP_525022.2)    | F |
| 16 | 2578297   | C            | T | <i>AMDHD2</i>   | <i>c.778C&gt;T (NM_001145815.1)</i>                                                             | p.(Arg260Cys) (NP_001139287.1) | F |
| 6  | 109200145 | <sup>B</sup> | - | <i>ARMC2</i>    | <i>NC_000006.11</i><br><i>(NM_032131.4):c.671+2592_671+261</i><br><i>1delCATCCACCCAGACCCATT</i> |                                | F |
| 11 | 76750976  | T            | A | <i>B3GNT6</i>   | <i>NM_138706.4:c.381T&gt;A</i>                                                                  | p.(Pro127=) (NP_619651.3)      | F |
| 17 | 80918994  | C            | T | <i>B3GNTL1</i>  | <i>NM_001009905.1:c.664G&gt;A</i>                                                               | p.(Val222Met) (NP_001009905.1) | F |
| 22 | 30116623  | G            | A | <i>CABP7</i>    | <i>NC_000022.10</i><br><i>(NM_182527.2):c.109+101G&gt;A</i>                                     |                                | F |
| 14 | 103404716 | C            | T | <i>CDC42BPB</i> | <i>NM_006035.3:c.4860G&gt;A</i>                                                                 | p.(Pro1620=) (NP_006026.3)     | F |
| 6  | 35765011  | G            | A | <i>CLPS</i>     | <i>NM_001832.3:c.55C&gt;T</i>                                                                   | p.(Pro19Ser) (NP_001823.1)     | F |
| 19 | 15770059  | C            | A | <i>CYP4F3</i>   | <i>NM_000896.2:c.1427C&gt;A</i>                                                                 | p.(Ala476Glu) (NP_000887.2)    | F |



|    |           |    |   |                    |                                                                                                    |                              |   |
|----|-----------|----|---|--------------------|----------------------------------------------------------------------------------------------------|------------------------------|---|
| 1  | 100679506 | A  | - | <i>DBT</i>         | <i>NC_000001.10</i><br>( <i>NM_001918.3</i> ):c.939+867delT                                        |                              | F |
| 17 | 7722271   | G  | A | <i>DNAH2</i>       | <i>NM_020877.2</i> :c.10705G>A                                                                     | p.(Asp3569Asn) (NP_065928.2) | F |
| 11 | 75167849  | AT | - | <i>GDPD5</i>       | <i>NM_030792.6</i> :c.327_328delAT                                                                 | p.(Cys110fs) (NP_110419.5)   | F |
| 19 | 14593508  | G  | A | <i>GIPC1</i>       | <i>NM_005716.3</i> :c.281C>T                                                                       | p.(Thr94Ile) (NP_005707.1)   | F |
| 6  | 42146612  | A  | G | <i>GUCA1A</i>      | <i>NM_000409.3</i> :c.424A>G                                                                       | p.(Lys142Glu) (NP_000400.2)  | F |
| 1  | 156814612 | T  | C | <i>INSRR/NTRK1</i> | <i>NC_000001.10</i><br>( <i>NM_014215.2</i> ):c.2461A>G<br>( <i>NM_001007792.1</i> ):c.122+2627T>C | p.(Lys821Glu) (NP_055030.1)  | F |
| 17 | 60003873  | C  | T | <i>INTS2</i>       | <i>NM_020748.2</i> :c.157G>A                                                                       | :p.(Ala53Thr) (NP_065799.1)  | F |
| 17 | 73485444  | G  | A | <i>KIAA0195</i>    | <i>NM_014738.4</i> :c.862G>A                                                                       | p.(Val288Ile) (NP_055553.3)  | F |
| 6  | 138582682 | C  | T | <i>KIAA1244</i>    | <i>NM_020340.4</i> :c.1123C>T                                                                      | p.(Arg375Cys) (NP_065073.3)  | F |
| 13 | 74420487  | G  | A | <i>KLF12</i>       | <i>NM_007249.4</i> :c.147C>T                                                                       | p.(Pro49=) (NP_009180.3)     | F |
| 6  | 42986134  | C  | A | <i>KLHDC3</i>      | <i>NM_057161.3</i> :c.573C>A                                                                       | p.(His191Gln) (NP_476502.1)  | F |
| 22 | 29545589  | G  | A | <i>KREMEN1</i>     | <i>NC_000022.10</i><br>( <i>NM_032045.4</i> ):c.1416+7501G>A                                       |                              | F |
| 17 | 79885565  | C  | G | <i>MAFG</i>        | <i>NM_002359.3</i> :c.-191G>C                                                                      |                              | F |
| 19 | 3786302   | A  | G | <i>MATK</i>        | <i>NC_000019.9</i><br>( <i>NM_002378.3</i> ):c.76-1420T>C                                          |                              | F |
| 11 | 102668089 | G  | T | <i>MMP1</i>        | <i>NM_002421.3</i> :c.248C>A                                                                       | p.(Thr83Asn) (NP_002412.1)   | F |
| 1  | 11307911  | A  | T | <i>MTOR</i>        | <i>NM_004958.3</i> :c.1081T>A                                                                      | p.(Cys361Ser) (NP_004949.1)  | F |
| 8  | 71036930  | C  | T | <i>NCOA2</i>       | <i>NM_006540.2</i> :c.4087G>A                                                                      | p.(Gly1363Arg) (NP_006531.1) | F |
| 4  | 95496916  | G  | A | <i>PDLIM5</i>      | <i>NC_000004.11</i><br>( <i>NM_001256426.1</i> ):c.292-178G>A                                      |                              | F |
| 3  | 47458897  | C  | A | <i>SCAP</i>        | <i>NM_012235.2</i> :c.2867G>T                                                                      | p.(Gly956Val) (NP_036367.2)  | F |
| 1  | 99127352  | G  | A | <i>SNX7</i>        | <i>NM_015976.4</i> :c.65G>A                                                                        | p.(Gly22Glu) (NP_057060.2)   | F |
| 7  | 48033927  | C  | T | <i>SUN3</i>        | <i>NM_152782.3</i> :c.846G>A                                                                       | p.(Lys282=) (NP_689995.3)    | F |
| 19 | 14674625  | G  | A | <i>TECR</i>        | <i>NM_138501.5</i> :c.177G>A                                                                       | p.(Leu59=) (NP_612510.1)     | F |
| 1  | 92161298  | T  | A | <i>TGFBR3</i>      | <i>NM_003243.4</i> :c.2368A>T                                                                      | p.(Ile790Phe) (NP_003234.2)  | F |
| 20 | 52109752  | A  | G | <i>TSHZ2</i>       | <i>NM_173485.5</i> :c.*6078A>G                                                                     |                              | F |

|    |           |   |   |                 |                                                                 |                                |   |
|----|-----------|---|---|-----------------|-----------------------------------------------------------------|--------------------------------|---|
| 13 | 115047277 | G | T | <i>UPF3A</i>    | <i>NM_023011.3:163G&gt;T</i>                                    | p.(Gly55Cys) (NP_075387.1)     | F |
| 10 | 75556529  | C | T | <i>ZSWIM8</i>   | <i>NC_000010.10</i><br>( <i>NM_001242488.1</i> ):c.3019-3C>T    |                                | F |
| 1  | 104297389 | C | T | <i>AMY1C</i>    | <i>NM_001008219.1:c.1054C&gt;T</i><br>( <i>NM_001008219.1</i> ) | p.(Arg352Ter) (NP_001008220.1) | G |
| 19 | 19765499  | C | T | <i>ATP13A1</i>  | <i>NM_020410.2:c.1666G&gt;A</i>                                 | p.(Glu556Lys) (NP_065143.2)    | G |
| 19 | 1237747   | G | A | <i>C19orf26</i> | <i>NC_000019.9</i><br><i>NM_152769.2:c.-22+8C&gt;T</i>          |                                | G |
| 1  | 75038073  | T | - | <i>C1orf173</i> | <i>NM_001002912.4:c.3321delA</i>                                | p.(Glu1108fs) (NP_001002912.4) | G |
| 2  | 55746980  | A | C | <i>CCDC104</i>  | <i>NM_080667.5:c.43A&gt;C</i>                                   | p.(Ser15Arg) (NP_542398.3)     | G |
| 11 | 68571565  | A | G | <i>CPT1A</i>    | <i>NM_001876.3:c.458T&gt;C</i>                                  | p.(Met153Thr) (NP_001867.2)    | G |
| 17 | 1340295   | C | T | <i>CRK</i>      | <i>NM_016823.3:c.396G&gt;A</i>                                  | p.(Glu132=) (NP_058431.2)      | G |
| 19 | 41307024  | G | A | <i>EGLN2</i>    | <i>NM_053046.3:c.547G&gt;A</i>                                  | p.(Val183Met) (NP_444274.1)    | G |
| 13 | 41515331  | G | A | <i>ELF1</i>     | <i>NM_172373.3:c.982C&gt;T</i>                                  | p.(Arg328Trp) (NP_758961.1)    | G |
| 17 | 78395733  | C | T | <i>ENDOV</i>    | <i>NM_173627.3:c.334C&gt;T</i>                                  | p.(Arg112Trp) (NP_775898.2)    | G |
| 9  | 130703472 | G | T | <i>FAM102A</i>  | <i>NM_001035254.2:c.*1999C&gt;A</i>                             |                                | G |
| 11 | 64011310  | C | T | <i>FKBP2</i>    | <i>NC_000011.9</i><br>( <i>NM_004470.3</i> ):c.332-3C>T         |                                | G |
| 19 | 48248821  | C | T | <i>GLTSCR2</i>  | <i>NM_015710.4:c.5C&gt;T</i>                                    | p.(Ala2Val) (NP_056525.2)      | G |
| 5  | 90136800  | A | G | <i>GPR98</i>    | <i>NM_032119.3:c.17017A&gt;G</i>                                | p.(Lys5673Glu) (NP_115495.3)   | G |
| 1  | 156593354 | C | T | <i>HAPLN2</i>   | <i>NM_021817.2:c.72C&gt;T</i>                                   | p.(Ala24=) (NP_068589.1)       | G |
| 5  | 177634178 | C | G | <i>HNRNPAB</i>  | <i>NM_031266.2:c.621C&gt;G</i>                                  | p.(Pro207=) (NP_112556.2)      | G |
| 5  | 53751640  | G | T | <i>HSPB3</i>    | <i>NM_006308.2:c.21G&gt;T</i>                                   | p.(Arg7Ser) (NP_006299.1)      | G |
| 17 | 1410318   | C | G | <i>INPP5K</i>   | <i>NM_016532.3:c.732G&gt;C</i>                                  | p.(Pro244=) (NP_057616.2)      | G |
| 8  | 12879416  | C | T | <i>KIAA1456</i> | <i>NM_020844.2:c.1228C&gt;T</i>                                 | p.(Arg410Cys) (NP_065895.2)    | G |
| 12 | 25368410  | C | T | <i>KRAS</i>     | <i>NM_033360.2:c.535G&gt;A</i>                                  | p.(Gly179Ser) (NP_203524.1)    | G |
| 11 | 68171104  | G | A | <i>LRP5</i>     | <i>NM_002335.2:c.1738G&gt;A</i>                                 | p.(Val580Ile) (NP_002326.2)    | G |
| 19 | 6212434   | C | T | <i>MLLT1</i>    | <i>NM_005934.3:c.*619G&gt;A</i>                                 |                                | G |
| 2  | 55476623  | G | T | <i>MTIF2</i>    | <i>NM_002453.2:c.889C&gt;A</i>                                  | p.(Pro297Thr) (NP_002444.2)    | G |

|    |           |      |   |                 |                                                                  |                                 |   |
|----|-----------|------|---|-----------------|------------------------------------------------------------------|---------------------------------|---|
| 5  | 137211606 | G    | C | <i>MYOT</i>     | <i>NM_006790.2:c.445G&gt;C</i>                                   | p.(Glu149Gln) (NP_006781.1)     | G |
| 12 | 132633427 | C    | T | <i>NOC4L</i>    | <i>NM_024078.1:c.888C&gt;T</i>                                   | p.(Arg296=) (NP_076983.1)       | G |
| 13 | 33338714  | C    | T | <i>PDS5B</i>    | <i>NM_015032.3:c.3606C&gt;T</i>                                  | p.(Asp1202=) (NP_055847.1)      | G |
| 6  | 122931475 | G    | A | <i>PKIB</i>     | <i>NC_000006.11</i><br>( <i>NM_001270394.1</i> ):c.-200-22953G>A |                                 | G |
| 1  | 89150050  | G    | A | <i>PKN2</i>     | <i>NM_006256.2:c.-214G&gt;A</i>                                  |                                 | G |
| 3  | 129286638 | GAC  | - | <i>PLXND1</i>   | <i>NM_015103.2:c.3874_3876delGTC</i>                             | p.(Val1292del) (NP_055918.2)    | G |
| 5  | 89808335  | A    | G | <i>POLR3G</i>   | <i>NM_006467.2:c.*379A&gt;G</i>                                  |                                 | G |
| 1  | 42925741  | TT   | - | <i>PPCS</i>     | <i>NM_024664.2:c.*144_*145delTT</i>                              |                                 | G |
| 1  | 12837669  | G    | T | <i>PRAMEF12</i> | <i>NM_001080830.1:c.1379G&gt;T</i>                               | p.(Gly460Val) (NP_001074299.1)  | G |
| 1  | 12837720  | G    | A | <i>PRAMEF12</i> | <i>NM_001080830.1:c.1430G&gt;A</i>                               | p.(Cys477Tyr) (NP_001074299.1:  | G |
| 5  | 139498729 | AGAA | - | <i>PURA</i>     | <i>NM_005859.4:c.*3994_*3997delAGAA</i>                          |                                 | G |
| 1  | 109780612 | C    | G | <i>SARS</i>     | <i>NM_006513.3:c.*102C&gt;G</i>                                  |                                 | G |
| 19 | 4546268   | G    | A | <i>SEMA6B</i>   | <i>NM_032108.3:c.1698C&gt;T</i>                                  | p.(Asp566=) (NP_115484.2:       | G |
| 9  | 130869703 | C    | G | <i>SLC25A25</i> | <i>NM_001006641.3:c.1492C&gt;G</i>                               | p.(Leu498Val) (NP_001006642.1:  | G |
| 19 | 56012091  | C    | T | <i>SSC5D</i>    | <i>NM_001144950.1:c.2537C&gt;T</i>                               | p.(Ala846Val) (NP_001138422.1:  | G |
| 19 | 4816902   | C    | T | <i>TICAM1</i>   | <i>NM_182919.3:c.1488G&gt;A</i>                                  | p.(Pro496=) (NP_891549.1:       | G |
| 5  | 72419666  | C    | T | <i>TMEM171</i>  | <i>NM_173490.6:c.466C&gt;T</i>                                   | p.(Arg156Trp) (NP_775761.4:     | G |
| 6  | 116599859 | T    | C | <i>TSPYL1</i>   | <i>NM_003309.3:c.1135A&gt;G</i>                                  | p.(Thr379Ala) (NP_003300.1:     | G |
| 12 | 49375692  | C    | G | <i>WNT1</i>     | <i>NM_005430.3:c.*269C&gt;G</i>                                  |                                 | G |
| 19 | 37441182  | C    | T | <i>ZNF568</i>   | <i>NM_198539.3:c.1127C&gt;T</i>                                  | p.(Ser376Phe) (NP_940941.2:     | G |
| 17 | 42854580  | G    | A | <i>ADAM11</i>   | <i>NM_002390.4:c.1728G&gt;A</i>                                  | p.(Thr576=) (NP_002381.2:       | H |
| 4  | 88053456  | G    | T | <i>AFF1</i>     | <i>NM_001166693.1:c.3207G&gt;T</i>                               | p.(Met1069Ile) (NP_001160165.1: | H |
| 11 | 111739334 | T    | C | <i>ALG9</i>     | <i>NM_024740.2:c.397A&gt;G</i>                                   | p.? (NP_079016.2)               | H |
| 11 | 116693892 | C    | T | <i>APOA4</i>    | <i>NM_000482.3:c.16G&gt;A</i>                                    | p.(Val6Met) (NP_000473.2)       | H |
| 17 | 40970997  | G    | A | <i>BECN1</i>    | <i>NC_000017.10</i><br>( <i>NM_003766.3</i> ):c.261-102C>T       |                                 | H |
| 17 | 48653130  | G    | A | <i>CACNA1G</i>  | <i>NM_018896.4:c.1367G&gt;A</i>                                  | p.(Arg456Gln) (NP_061496.2)     | H |

|    |           |   |   |                 |                                                            |                                |   |
|----|-----------|---|---|-----------------|------------------------------------------------------------|--------------------------------|---|
| 11 | 34120073  | A | G | <i>CAPRIN1</i>  | <i>NC_000011.9</i><br>( <i>NM_005898.4</i> ):c.2065+765A>G |                                | H |
| 4  | 110624537 | C | T | <i>CASP6</i>    | <i>NM_001226.3</i> :c.15G>A                                | p.(Ser5=) (NP_001217.2)        | H |
| 11 | 58393171  | A | - | <i>CNTF</i>     | <i>NM_000614.3</i> :c.*1176delA                            |                                | H |
| 15 | 33359950  | C | G | <i>FMN1</i>     | <i>NM_001277313.1</i> :c.2044-2675G>C                      | p.(Glu46=) (NP_001096654.1)    | H |
| 11 | 105769010 | T | A | <i>GRIA4</i>    | <i>NM_000829.3</i> :c.742T>A<br>( <i>NM_000829.3</i> )     | p.(Ser248Thr) (NP_000820.3)    | H |
| 9  | 5772931   | C | T | <i>KIAA1432</i> | <i>NM_020829.3</i> :c.3834C>T                              | p.(Asp1278=) (NP_065880.2)     | H |
| 11 | 60160176  | C | A | <i>MS4A7</i>    | <i>NM_021201.4</i> :c.565C>A                               | p.(Leu189Ile) (NP_067024.1)    | H |
| 1  | 40367533  | C | A | <i>MYCL</i>     | <i>NM_001033082.2</i> :c.28G>T                             | p.(Ala10Ser) (NP_001028254.2)  | H |
| 1  | 40367535  | G | A | <i>MYCL</i>     | <i>NM_001033082.2</i> :c.26C>T                             | p.(Ala9Val) (NP_001028254.2)   | H |
| 11 | 69064721  | A | G | <i>MYEOV</i>    | <i>NM_138768.2</i> :c.*862A>G                              |                                | H |
| 11 | 66192648  | G | A | <i>NPAS4</i>    | <i>NM_178864.3</i> :c.2287G>A                              | p.(Ala763Thr) (NP_849195.2)    | H |
| 3  | 136047691 | C | T | <i>PCCB</i>     | <i>NM_001178014.1</i> :c.1550C>T                           | p.(Ala517Val) (NP_001171485.1) | H |
| 11 | 65404802  | C | T | <i>PCNXL3</i>   | <i>NM_032223.2</i> :c.*353C>T                              |                                | H |
| 11 | 64697864  | C | T | <i>PPP2R5B</i>  | <i>NC_000011.9</i><br>( <i>NM_006244.3</i> ):c.782+11C>T   |                                | H |
| 11 | 64532210  | T | C | <i>SF1</i>      | <i>NM_001178030.1</i> :c.*716A>G                           |                                | H |
| 3  | 133748570 | G | A | <i>SLCO2A1</i>  | <i>NM_005630.2</i> :c.77C>T                                | p.(Ser26Leu) (NP_005621.2)     | H |
| 1  | 59041116  | T | C | <i>TACSTD2</i>  | <i>NM_002353.2</i> :c.*741A>G                              |                                | H |
| 4  | 122682720 | C | T | <i>TMEM155</i>  | <i>NM_152399.2</i> :c.185G>A                               | p.(Arg62His) (NP_689612.2)     | H |
| 4  | 147824789 | G | A | <i>TTC29</i>    | <i>NM_031956.2</i> :c.493C>T                               | p.(Arg165Ter) (NP_114162.2)    | H |
| 11 | 118951881 | C | T | <i>VPS11</i>    | <i>NM_021729.4</i> :c.2517C>T                              | p.(His839Tyr) (NP_068375.3)    | H |

289 <sup>a</sup>CTGCTGGAGCTGCTGCTGCTGTAA, <sup>b</sup>CATCCACCCAGACACCCATT, \* 3'UTR

290

291

292 *Nonsynonymous variants*

293

294 We conducted the MM-KBAC analysis on 11,272 rare nonsynonymous variants in 4,877

295 genes and obtained a total of 316 genes with  $p < 0.05$ . After annotation of variants, we

296 obtained 87 variants that co-segregated within families. One variant in *COPZ2* was

297 removed from analysis based on the  $MAF > 0.01$  reported in ExAC although it was not

298 reported in the 1000 Genomes data.

299 *LoF variants*

300

301 The analysis was performed on 1,364 rare LoF variants located in 711 genes and a total

302 of 60 genes were obtained with a  $p < 0.05$ . Following annotation, 13 deleterious variants

303 co-segregated within families (Table 2). For Indel variants, BAM files were manually

304 examined using the Genome browser in SVS v8.6 (Golden Helix) to verify the variant.

305 *Variants in 5'-UTR and 3'-UTR regions*

306

307 The MM-KBAC analysis was conducted on 26,872 rare variants in 8,299 genes and 409

308 genes were obtained with a  $p < 0.05$ . Following annotation of variants and analysis of co-

309 segregation, 25 variants co-segregated within families (Table 2).

310 *Synonymous variants*

311

312 The analysis was performed on 5,854 synonymous rare variants located in 3,164 genes

313 and a total of 216 genes with a  $p$  value  $< 0.05$  were obtained. Following annotation, a total

314 of 35 variants co-segregated within families (Table 2). A variant in *ASB16* was excluded

315 from the analysis based on the allele frequency reported in ExAC ( $MAF = 0.0278$ ). We

316 also investigated whether synonymous variants were located in splicing enhancer and

317 silencer regions within genes. The variants c.429G>A (NM\_006024.6), c.3606C>T,

318 c.1809G>A and c.177G>A were identified in enhancer regions in the *TAX1BP1*, *PDS5B*,

319 *NTN1* and *TECR* genes respectively and c.72C>T (NM\_02817.2), c.846G>A  
320 (NM\_152782.3), and c.861C>T (NM\_024830.3) were located in splicing silencer regions  
321 in the *HAPLN2*, *SUN3*, and *LPCAT1* genes respectively (Table 3).

322

323 **Table 3. Synonymous variants in enhancer and splicing regions identified in families co-segregating with ET based on MM-**  
 324 **KBAC analysis of rare variants**  
 325

| Chr | Position    | REF | ALT | Gene name      | Variant Type | Motif seq       | Motif type | Chromosome location of motif |
|-----|-------------|-----|-----|----------------|--------------|-----------------|------------|------------------------------|
| 7   | 27,809,333  | G   | A   | <i>TAX1BP1</i> | synonymous   | GA <u>ACTG</u>  | ESE        | chr7:27,809,328-27,809,333   |
| 13  | 33,338,714  | C   | T   | <i>PDS5B</i>   | synonymous   | AG <u>ACG</u> A | ESE        | chr13:33338711-33,338,716    |
|     |             |     |     |                |              | G <u>ACG</u> AC | ESE        | chr13:33338712-33,338,717    |
|     |             |     |     |                |              | A <u>CG</u> ACT | ESE        | chr13:33338713-33,338,718    |
| 17  | 9,143,279   | G   | A   | <i>NTN1</i>    | synonymous   | AGA <u>AAGG</u> | ESE        | chr17:9,143,275-9,143,280    |
| 19  | 14,674,625  | G   | A   | <i>TECR</i>    | synonymous   | CCT <u>GAA</u>  | ESE        | chr19:14674622-14,674,627    |
|     |             |     |     |                |              | CT <u>G</u> AAG | ESE        | chr19:14674623-14,674,628    |
|     |             |     |     |                |              | T <u>G</u> AAGG | ESE        | chr19:14674624-14,674,629    |
|     |             |     |     |                |              | <u>G</u> AAGGA  | ESE        | chr19:14674625-14,674,630    |
| 1   | 156,593,354 | C   | T   | <i>HAPLN2</i>  | synonymous   | <u>CCA</u> AGG  | ESS        | chr1:156,593,354-156,593,359 |
| 5   | 1,477,557   | G   | A   | <i>LPCAT1</i>  | synonymous   | <u>GGG</u> GTT  | ESS        | chr5:1,477,557-1,477,562     |
| 7   | 48,033,927  | C   | T   | <i>SUN3</i>    | synonymous   | TTC <u>CTT</u>  | ESS        | chr7:48,033,924-48,033,929   |
|     |             |     |     |                |              | <u>CTT</u> GGG  | ESS        | chr7:48,033,927-48,033,932   |

326

327 *Intronic variants*

328

329 The MM-KBAC analysis was conducted on 1,174,082 intronic rare variants located in  
330 16,486 genes and 324 genes with a  $p$  value < 0.05 were obtained. Following annotation  
331 and co-segregation analysis, we obtained a total of 14 deleterious variants that co-  
332 segregated within families (Table 2).

333

334 *DNase I Hypersensitivity Sites and Transcription Factor Binding Sites*

335

336 Genetic variants can affect transcription factor binding sites (TFBS), particularly via their  
337 enrichment in *DNase I* hypersensitive sites (DHS) that provide open chromatin access to  
338 transcription factors. Thus we sought variants that could be enriched at these sites using  
339 TFBS conserved data in ENCODE [40]. We asked whether the 169 variants (MM-KBAC  
340 analysis by variant type, and that includes annotated variants that co-segregated within  
341 ET families) identified from our analyses were found in DHS. 67 variants in 65 genes  
342 were in DHS. These 67 variants comprised 6 of 67 (9%) 5'-UTR variants; 6 of 67 (9%)  
343 3'-UTR variants; 3 of 67 (4%) were LoF variants; 36 of 67 (54%) were nonsynonymous  
344 variants; 12 of 67 (18%) were synonymous; and 4 of 67 (6%) intronic variants.

345 DHSs are enriched with transcription factor binding sites (TFBSs), crucial sequences for  
346 the regulation of gene expression. Cross species conservation of genomic sequence has  
347 been successfully used for identifying biologically functional TFBS [41]. We identified 40  
348 variants within TFBS (Table 4).

349 **Table 4. Variants located within TFBS identified in families co-segregating with ET**

350

| Chromosome | Position | Reference | Alternates | Transfac binding matrix id | Strand | Family |
|------------|----------|-----------|------------|----------------------------|--------|--------|
| 1          | 11307911 | A         | T          | <i>TCF11MAFG_01</i>        | +      | F      |
| 1          | 40367533 | C         | A          | <i>ELK1_01</i>             | +      | H      |
| 1          | 40367535 | G         | A          | <i>ELK1_01</i>             | +      | H      |
| 1          | 92161298 | T         | A          | <i>CART1_01</i>            | -      | F      |



|    |           |    |   |                   |   |   |
|----|-----------|----|---|-------------------|---|---|
| 2  | 70524477  | G  | C | <i>CREB_02</i>    | + | C |
| 3  | 47458897  | C  | A | <i>MAZR_01</i>    | + | F |
| 3  | 135721907 | A  | G | <i>YY1_01</i>     | - | C |
| 3  | 136047691 | C  | T | <i>LUN1_01</i>    | + | H |
| 4  | 88053456  | G  | T | <i>YY1_01</i>     | - | H |
| 4  | 95496916  | G  | A | <i>PAX4_04</i>    | + | F |
| 5  | 53751640  | G  | T | <i>HTF_01</i>     | + | G |
| 5  | 72419666  | C  | T | <i>SEF1_C</i>     | - | G |
| 5  | 90136800  | A  | G | <i>MEF2_04</i>    | + | G |
| 6  | 42146612  | A  | G | <i>COMP1_01</i>   | + | F |
| 6  | 42986134  | C  | A | <i>HOX13_01</i>   | + | F |
| 6  | 122931475 | G  | A | <i>SP1_Q6</i>     | + | G |
| 8  | 23177415  | C  | G | <i>AHRARNT_02</i> | + | B |
| 8  | 53321917  | C  | T | <i>AREB6_01</i>   | - | A |
| 8  | 71036930  | C  | T | <i>AREB6_04</i>   | + | F |
| 11 | 60160176  | C  | A | <i>NRSF_01</i>    | - | H |
| 11 | 62283386  | A  | C | <i>HNF1_01</i>    | + | A |
| 11 | 66192648  | G  | A | <i>AREB6_04</i>   | - | H |
| 11 | 68171104  | G  | A | <i>TCF11_01</i>   | + | G |
| 11 | 69064721  | A  | G | <i>TBP_01</i>     | + | H |
| 11 | 75167849  | AT | - | <i>PPARA_01</i>   | - | F |
| 11 | 102668089 | G  | T | <i>AREB6_04</i>   | + | F |
| 13 | 74420487  | G  | A | <i>SRF_01</i>     | - | F |
| 14 | 103404716 | C  | T | <i>P53_01</i>     | + | F |
| 17 | 1410318   | C  | G | <i>PAX3_01</i>    | - | G |
| 17 | 7722271   | G  | A | <i>CREB_02</i>    | + | F |
| 17 | 42854580  | G  | A | <i>PAX5_01</i>    | + | H |
| 17 | 43922409  | A  | G | <i>TAXCREB_01</i> | - | C |
| 17 | 73485444  | G  | A | <i>NRSF_01</i>    | - | F |
| 17 | 79885565  | C  | G | <i>AP4_01</i>     | - | F |
| 17 | 80918994  | C  | T | <i>PAX4_01</i>    | - | F |
| 18 | 55362414  | -  | A | <i>TCF11_01</i>   | - | C |
| 19 | 1237747   | G  | A | <i>PAX5_01</i>    | - | G |
| 19 | 4816902   | C  | T | <i>HEN1_01</i>    | + | G |
| 19 | 19765499  | C  | T | <i>PPARA_01</i>   | - | G |
| 19 | 48248821  | C  | T | <i>YY1_02</i>     | - | G |

351  
352  
353

354

## 355 **Phenolyzer Analysis**

356 We used phenolyzer to prioritize candidate genes within ET families. The results of the  
357 phenolyzer network analysis for 5 families (A, B, D, F, H) are shown in S1 Fig.

358

### 359 **Family A**

360 *KARS* is predicted to be the most disease relevant seed gene (raw score 0.03532;  
361 normalized score 0.004) because it maps to Charcot Marie Tooth disease recessive  
362 intermediate b in OMIM (OMIM 613641) and DISGENET (C3150897)(S1 Fig.). The  
363 nonsynonymous variant identified in *KARS* (c.1513C>T (NM\_001130089.1),  
364 p.(Arg505Cys)) has a Phred scaled CADD score of 28.6 and is predicted to be  
365 deleterious or damaging by several *In Silico* tools (SIFT, POLYPHEN2, Mutation Taster,  
366 FATHMM, Provean, MetaSVM and Meta LR). The top three predicted genes are  
367 *ARGEF1* (normalized score 0.011), *PHOSPHO1* (normalized score 0.008) and *AMBRA1*  
368 (normalized score 0.004).

### 369 **Family B**

370

371 *KIF5A* is predicted to be the most disease relevant seed gene (raw score 0.2954;  
372 normalized score 0.033) because it maps to spastic paraplegia 10 in OMIM (OMIM  
373 604187) and DISGENET (C1858712). The variant identified in *KIF5A* is a synonymous  
374 variant (c.2769G>A (NM\_004984.2), p.(Arg923=)) with a phred-scaled CADD score of  
375 10.95. The nucleotide c.2769 (NM\_004984.2) (Chr12:57,975,211) is highly evolutionarily  
376 conserved and the FAS-ESS web tool identifies the exon splicing motif 'CCACTA' in  
377 close proximity (Chr12:57,975,217-57,975,222). The top four predicted genes include  
378 *ARHGEF28* (raw score 0.1506; normalized score 0.016), *PSD4* (raw score 0.1208;  
379 normalized score 0.013), *LPCAT1* (raw score 0.09227; normalized score 0.01) and  
380 *KCNH3* (raw score 0.08023; normalized score 0.008) based on their protein interactions,

381 the same biosystem (e.g. *ARHGEF28*, biosystem Axon guidance, EH-Ephrin signaling  
382 and developmental biology), the same gene family (e.g. *PSD4*; gene family, Pleckstrin  
383 homology (PH) domain containing or *KCNH3*; gene family, potassium channels Voltage-  
384 gated ion channels) or transcription interactions (e.g. *LPCAT1* regulated by ETS1  
385 transcription factor).

### 386 **Family C**

387  
388 The top ranked gene is a predicted gene, *MATK* (raw score 0.4266; normalized score  
389 0.046) based on protein interactions (e.g. yeast 2-hybrid with *EWSR1*), the same  
390 biosystem (e.g. signal transduction, neurotrophic factor-mediated Trk receptor  
391 signalling), the same gene family (e.g. SH2 domain containing) or transcription  
392 interactions (e.g. regulated by *GATA2*). The next top three genes (predicted) are  
393 *WNT9B* (normalized score 0.025), *TAX1BP1* (normalized score 0.015) and *PPP2R3A*  
394 (normalized score 0.015).

395

### 396 **Family D**

397 *SLIT3* is predicted to be one of the most disease relevant seed gene, with a raw score of  
398 0.1637 and normalized score of 0.017, respectively (S1 Fig.). *SLIT3* maps to temporal  
399 lobe epilepsy in DISGENET (C0014556) but a disease association with *SLIT3* has not  
400 been described in OMIM. The non-synonymous variant identified in *SLIT3* (c.3505G>C  
401 (NM\_001271946.1), p.(Val1169Leu)); rs144799628) has a Phred scaled CADD score of  
402 22.5 and is predicted to be deleterious or damaging by several *in silico* tools (LRT Pred,  
403 Mutation Taster, and FATHMM). The top three predicted genes are *TRAF2* (normalized  
404 score 0.035), *EPHB3* (normalized score 0.016) and *SLC22A16* (normalized score 0.01).  
405 The variants identified in *TRAF2* (c.1335C>T (NM\_021138.3), p.(Asp445=)); phred  
406 scaled CADD score of 10.96) and *EPHB3* (c.618C>T (NM\_004443.3), p.(Arg206=));

407 phred scaled score 13.71) are synonymous variants with weak evidence for  
408 pathogenicity. The *SLC22A16* (also known as *OCT6*) variant (c.1309delC  
409 (NM\_033125.3), p.(Gln437fs)) is a LoF frameshift variant, with a phred-scaled CADD  
410 score of 35, that is predicted to result in premature termination of the protein.

#### 411 **Family E**

412  
413 No annotated (phred-scaled CADD score >10 or predicted deleterious or damaging by *in*  
414 *silico* tools) segregating rare deleterious variants were identified in Family E

415

#### 416 **Family F**

417  
418 The top predicted disease relevant seed gene is *NTRK1* (raw score 5.152; normalized  
419 score 0.538) based on disease mapping to congenital sensory neuropathy with  
420 anhidrosis, hereditary sensory and autonomic neuropathy IV (HSAN4) and familial  
421 dysautonomia type II in OMIM (OMIM 256800), DISGENET (C0020074), and  
422 ORPHANET (642). The variant identified in *NTRK1* is an intronic variant (intron  
423 2;NM\_001007792.1:c.122+2627T>C) located in an ENCODE annotated open  
424 chromatin/TFBS region (openChrom\_2127) of the *NTRK1* gene. The top three predicted  
425 genes are *GIPC1* (normalized score 0.06), *MATK* (0.045) and *NCOA2* (normalized score  
426 0.04).

#### 427 **Family G**

428  
429 The top ranked and predicted seed gene is *CRK* (raw score 0.6991; normalized score  
430 0.073) based on disease mapping in DISGENET, protein interactions (PUBMED  
431 16713569; yeast 2-hybrid with *ATXN1*, score 0.004856), the same biosystem (e.g. signal  
432 transduction; *NGF* signaling via *TRKA* form the plasma membrane; signal transduction;  
433 signalling to ERKs; signalling by *NGF*; neurotrophic factor-mediated Trk receptor

434 signaling), the same gene family (e.g. SH2 domain containing) or transcription  
435 interactions.

436

#### 437 **Family H**

438 *CACNA1G* is predicted to be the most disease relevant seed gene (raw score 0.3719;  
439 normalized score 0.039) because it maps to Spinocerebellar ataxia 42 in OMIM (OMIM  
440 616795) (S1 Fig.). The nonsynonymous variant identified in *CACNA1G* (c.1367G>A  
441 (NM\_018896.4), p.(Arg456Gln)) has a phred-scaled CADD score of 16.13 and is  
442 predicted to be deleterious or damaging by several *In Silico* tools (POLYPHEN2,  
443 Mutation Taster, FATHMM, Provean, MetaSVM and Meta LR). The top three predicted  
444 genes are *PPP2R5B* (intronic variant; normalized score 0.4464), *CASP6* (synonymous  
445 variant; normalized score 0.021) and *ADAM11* (synonymous variant; normalized score  
446 0.016).

#### 447 ***CACNA1G***

448 We evaluated all candidate genes prioritized by phenolyzer in a previously published  
449 WES dataset of ET families [15]. We identified one family (S2 Fig.) with a non-  
450 synonymous variant in *CACNA1G* (c.3635G>A (NM\_018896.4), p.(Arg1212Gln)),  
451 rs150972562) that is highly conserved evolutionarily and is predicted to be deleterious or  
452 damaging by several *in silico* tools (provean (score: -3.62), SIFT (score: 0.002) and  
453 Mutation Taster (disease causing)) that co-segregated with ET. This *CACNA1G* variant  
454 was apparent retrospectively but was not identified in the prior analysis using the  
455 bioinformatics pipeline or analysis methods applied in the WES study. The allele  
456 frequency of rs150972562 in the Exome Aggregation Consortium (ExAC) database is  
457 0.001596 (192/120264+1 homozygote), which is below the estimates of the disease  
458 prevalence of ET at 2-4%.

459

## 460 **DISCUSSION**

461 In this study, we applied the MM-KBAC test [19] to analyze rare variants in the WGS  
462 data generated from eight early-onset ET families enrolled in the family study of  
463 Essential Tremor (FASET). While numerous methods have been described for rare  
464 variant analysis in case-control studies, relatively few methods exist for family-based  
465 studies. The advantages of family-based studies are their robustness to population  
466 stratification [42], and the use of information about transmission of genetic factors within  
467 families, which is more powerful than population-based case control studies [43]. Genes  
468 identified by MM-KBAC analysis in ET families were prioritized using phenolyzer.  
469 Phenolyzer prioritizes candidate genes based on disease or phenotype information.  
470 Phenolyzer includes multiple components, including a tool to map the user-supplied  
471 phenotype to related disease, a resource that integrates existing knowledge on disease  
472 genes, an algorithm to predict previously unknown disease genes, a machine learning  
473 model that integrates multiple features to score and prioritize candidate genes and a  
474 network visualization tool to examine gene-gene and gene-disease relationships [39].  
475 Previously, we performed WES [15] on a subset of the families (Families A, B, E and F)  
476 included in the current WGS analysis. For these families, WES did not identify the  
477 candidate genes identified in the current WGS study. There are several reasons why  
478 variants and candidate genes could have been missed in the prior WES analysis.  
479 Recently published studies [18, 44] suggest that WGS is more powerful than WES for  
480 detecting potential disease-causing mutations within WES regions, particularly those due  
481 to SNVs. WGS which forgoes capturing is less sensitive to GC content and is more  
482 likely than WES to provide complete coverage of the entire coding region. Other factors  
483 that can affect variant and candidate gene identification include the bioinformatics  
484 pipeline (GATK version and implementation options) used and statistical analysis

485 methods (WES study pVAAST [15, 45] versus WGS in the current study: MM-KBAC  
486 [45]).  
487 In the current study, within each ET family, we generated a prioritized candidate gene list  
488 that can be considered for functional studies. In family H, *CACNA1G* is predicted to be  
489 the most disease relevant seed gene because it maps to Spinocerebellar ataxia 42  
490 (SCA42) in OMIM (OMIM 616795). *CACNA1G* is also a genetic modifier of epilepsy [46,  
491 47]. The identification of a second family, with a deleterious/damaging *CACNA1G*  
492 variant, from a previously published WES dataset strongly suggests that *CACNA1G* may  
493 be a susceptibility gene for ET. SCA42 is an autosomal dominant neurologic  
494 channelopathy disorder characterized predominantly by gait instability, tremor (i.e.  
495 intention, postural, head, and resting) and additional cerebellar signs (i.e. dysarthria,  
496 nystagmus and saccadic pursuits), and is caused by a heterozygous mutation in  
497 *CACNA1G*. There is variable age at onset (range 9- >78 years) and slow progression of  
498 the disease. We reviewed the clinical data in the *CACNA1G* families for the  
499 characteristic signs of SCA42 including ataxia, gait instability and ocular signs [48-50].  
500 None of the individuals with ET in these families exhibited these problems, suggesting  
501 that these families do not have SCA. On the other hand, neuropathologic studies  
502 available for an 83 year old affected individual with SCA42, who also had dementia,  
503 showed cerebellar atrophy with Purkinje cell loss and loss of neurons in the inferior olive  
504 [48], which in terms of the Purkinje cell loss, is consistent with neuropathological findings  
505 of some ET patients [51].  
506 The *CACNA1G* gene encodes the pore forming subunit of T-type Ca(2+) channels,  
507 Ca<sub>v</sub>3.1, and is expressed in various motor pathways and may serve different functions  
508 [52]. The T-type calcium channel, Ca<sub>v</sub>3.1, has been previously implicated in neuronal  
509 autorhythmicity [53, 54] and is thought to underlie tremors seen in Parkinson's disease

510 [55] , enhanced physiological tremor, and in ET [56] and T-type calcium channel  
511 antagonists have been shown to reduce tremor in mouse models of ET [54, 57, 58].  
512 The identification of *CACNA1G* in two ET families in the current study is consistent with  
513 recent reports of mutations in other ion channel genes in other ET families and the  
514 concept that the ETs are channelopathies [14, 15]. We previously reported the  
515 identification of a mutation in *Kv9.2 (KCNS2)*, that encodes an electrically silent voltage-  
516 gated K<sup>+</sup> channel  $\alpha$  subunit, in a family with pure ET [15]. Kv9.2 is highly and selectively  
517 expressed in the brain and modulates the activity of Kv2.1 and Kv2.2 channels, which  
518 play a major role in membrane excitability and synaptic transmission and is critical for  
519 motor control and other neuronal network functions [59]. In two families with atypical ET,  
520 mutations were also identified in genes encoding voltage-gated sodium channel alpha  
521 subunits. In a family with epilepsy and ET, a disease-segregating mutation  
522 p.(Gly1537Ser) in the *SCN4A* gene was identified and functional analyses demonstrated  
523 more rapid channel kinetics and altered ion selectivity, which may contribute to the  
524 phenotype of tremor and epilepsy in this family [14]. In a four generation Chinese family,  
525 with early onset familial episodic pain and ET, a gain-of-function missense mutation  
526 p.(Arg225Cys) in *SCN11A* was identified [60]. Collectively, identification of mutations in  
527 a T type Ca(2+) channel (*CACNA1G*; two families, this study), a voltage-gated K<sup>+</sup>  
528 channel  $\alpha$  subunit (*Kv9.2; KCNS2*, 1 family), and voltage-gated sodium channel alpha  
529 subunits (*SCN4A* and *SCN11A*) in ET families (five total to date) is emerging evidence  
530 that problems in regulation of membrane excitability and synaptic transmission, which  
531 are important more broadly for motor control and other neuronal network functions, could  
532 play a role in the pathophysiology of ET. The genetic basis of ET has so far remained  
533 elusive. Given the clinical and genetic heterogeneity observed in ET [11-16], evaluation  
534 of ion channel genes as candidate genes for ET is warranted.



535 In family D, *SLIT3* is predicted to be the most disease relevant gene. A disease  
536 association with *SLIT3* in OMIM has not been described. The non-synonymous variant  
537 identified in *SLIT3* (c.3505G>C, p.(Val1169Leu); rs144799628) is highly conserved  
538 evolutionarily, is predicted to be deleterious or damaging by several *in silico* tools and  
539 has an allele frequency in the ExAC database of 0.0006407 (72/112370+2  
540 homozygotes), which is below the estimates of the disease prevalence of ET at 2-4%. A  
541 disease association of SNPs in the *SLIT3* gene and genetic risk (models: susceptibility,  
542 survival and age-at-onset) for Parkinson disease was previously identified in two  
543 independent GWAS datasets [61]. Axon guidance pathway molecules are involved in  
544 defining precise neuronal network formation during development and in the adult central  
545 nervous system play a role in the maintenance and plasticity of neural circuits. The Slit  
546 axon guidance molecules and their receptors, known as Robo (Roundabout) serve as a  
547 repellent to allow precise axon pathfinding and neuronal migration during development.  
548 Three Slit ligands have been identified in vertebrates with spatio-temporal expression  
549 patterns in the nervous system as well as in the peripheral tissue and other organs  
550 during development. Slit or Robo null gene animal models (*Drosophila* or mouse) show  
551 that Slit-Robo interactions act as a repulsive signal to regulate actin dynamics for axon  
552 guidance at the midline for commissural, retinal, olfactory, cortical and precerebellar  
553 axons [62]. The mechanism by which *SLIT3* contributes to ET may involve early  
554 degenerative changes in the years preceding diagnosis and possibly even during brain  
555 development (the miswiring hypothesis). In one published study, the candidate gene,  
556 *TENM4*, which is a regulator of axon guidance and central myelination, was identified in  
557 three ET families [12]. This finding together with the identification of *SLIT3* as a  
558 candidate gene in an ET family in the current study suggests that in some instances ET  
559 may be a disorder of axon guidance.

560

561 In three families, phenolyzer prioritized genes that are associated with hereditary  
562 neuropathies (family A, *KARS*, Charcot-Marie-Tooth disease B (OMIM 613641); family  
563 B, *KIF5A*, spastic paraplegia 10 with or without peripheral neuropathy (OMIM 604187);  
564 and family F, *NTRK1*, hereditary sensory and autonomic neuropathy IV (OMIM 256800).  
565 Among the clinical features of CMTRIB with peripheral neuropathy, electrophysiologic  
566 studies show motor nerve conduction velocities of 39.5 and 30.6 m/s in the median and  
567 ulnar nerves, respectively consistent with an intermediate phenotype between that of  
568 demyelinating and axonal CMT [63]. Heterozygous pathogenic mutations in *KIF5A* are  
569 also known to cause an axonal CMT subtype [40]. Interestingly, tremor is known to occur  
570 in patients with neuropathies although its reported prevalence varies widely [64]. In a  
571 case control study that assessed the presence and severity of tremor using the Fahn-  
572 Tolosa-Marin Scale, Archimedes spirals and Bain and Findley spiral score, in 43  
573 consecutively recruited patients with inflammatory neuropathies, twenty seven (63%)  
574 patients had tremor (posture or action) with a mean age at tremor onset of 57.6 (11.6)  
575 years (widely) [64].  
576 In summary, WGS analysis identified candidate genes for ET in 5/8 (62.5%) of the  
577 families analyzed. WES analysis of these families in our previously published study  
578 failed to identify candidate genes. One drawback to our study is that structural variants  
579 (SVs) and copy number variants (CNVs) were not analyzed. However, recent studies  
580 suggest that short read Illumina technology for WGS is unable to accurately identify SVs  
581 and CNVs and that long read sequencing (PacBio) or other technologies based on  
582 nanochannel arrays, such as the Bionano genomics IRYS next generation platform, are  
583 needed for accurate detection [65]  
584

585 The genes and pathways that we have identified can now be prioritized for functional  
586 studies to further our understanding of the pathophysiology of ET using cellular and  
587 animal models.

588

589

## 590 **ACKNOWLEDGEMENTS**

591 We thank the patients and families for participating in the study. We also thank and  
592 acknowledge the New York Genome Center for performing and generating the WGS  
593 data.

594 *Conflict of Interest Statement.* The authors have no conflict of interest.

595

## 596 **SUPPLEMENTARY INFORMATION**

597 **S1 Fig. Phenolyzer network analysis of WGS gene findings, disease terms and**  
598 **disease types.**

599 **S2 Fig. Pedigree for family with CACNA1G variant (c.3635G>A (NM\_018896.4),**  
600 **p.(Arg1212Gln)), identified from a WES dataset**

601 Supplementary Information accompanies the paper on the PLOS one website.

602

## 603 **REFERENCES**

- 604 1. Louis ED, Ferreira JJ. How common is the most common adult movement  
605 disorder? Update on the worldwide prevalence of essential tremor. *Movement disorders*  
606 : official journal of the Movement Disorder Society. 2010;25(5):534-41. Epub 2010/02/23.  
607 doi: 10.1002/mds.22838. PubMed PMID: 20175185.
- 608 2. Bain PG, Findley LJ, Thompson PD, Gresty MA, Rothwell JC, Harding AE, et al.  
609 A study of hereditary essential tremor. *Brain*. 1994;117 ( Pt 4):805-24. Epub 1994/08/01.  
610 PubMed PMID: 7922467.

- 611 3. Findley LJ. Epidemiology and genetics of essential tremor. *Neurology*.  
612 2000;54(11 Suppl 4):S8-s13. Epub 2000/06/15. PubMed PMID: 10854346.
- 613 4. Lorenz D, Frederiksen H, Moises H, Kopper F, Deuschl G, Christensen K. High  
614 concordance for essential tremor in monozygotic twins of old age. *Neurology*.  
615 2004;62(2):208-11. Epub 2004/01/28. PubMed PMID: 14745055.
- 616 5. Tanner CM, Goldman SM, Lyons KE, Aston DA, Tetrud JW, Welsh MD, et al.  
617 Essential tremor in twins: an assessment of genetic vs environmental determinants of  
618 etiology. *Neurology*. 2001;57(8):1389-91. Epub 2001/10/24. PubMed PMID: 11673577.
- 619 6. Louis ED, Dogu O. Does age of onset in essential tremor have a bimodal  
620 distribution? Data from a tertiary referral setting and a population-based study.  
621 *Neuroepidemiology*. 2007;29(3-4):208-12. Epub 2007/11/29. doi: 10.1159/000111584.  
622 PubMed PMID: 18043006; PubMed Central PMCID: PMCPMC2824583.
- 623 7. Gulcher JR, Jonsson P, Kong A, Kristjansson K, Frigge ML, Karason A, et al.  
624 Mapping of a familial essential tremor gene, FET1, to chromosome 3q13. *Nat Genet*.  
625 1997;17(1):84-7. Epub 1997/09/01. doi: 10.1038/ng0997-84. PubMed PMID: 9288103.
- 626 8. Higgins JJ, Pho LT, Nee LE. A gene (ETM) for essential tremor maps to  
627 chromosome 2p22-p25. *Movement disorders : official journal of the Movement Disorder*  
628 *Society*. 1997;12(6):859-64. Epub 1997/12/17. doi: 10.1002/mds.870120605. PubMed  
629 PMID: 9399207.
- 630 9. Shatunov A, Sambuughin N, Jankovic J, Elble R, Lee HS, Singleton AB, et al.  
631 Genomewide scans in North American families reveal genetic linkage of essential tremor  
632 to a region on chromosome 6p23. *Brain*. 2006;129(Pt 9):2318-31. Epub 2006/05/17. doi:  
633 10.1093/brain/awl120. PubMed PMID: 16702189.
- 634 10. Hicks JE, Konidari I, Scott BL, Stajich JM, Ashley-Koch AE, Gilbert JR, et al.  
635 Linkage of familial essential tremor to chromosome 5q35. *Movement disorders : official*

- 636 journal of the Movement Disorder Society. 2016;31(7):1059-62. Epub 2016/02/27. doi:  
637 10.1002/mds.26582. PubMed PMID: 26918299.
- 638 11. Merner ND, Girard SL, Catoire H, Bourassa CV, Belzil VV, Riviere JB, et al.  
639 Exome sequencing identifies FUS mutations as a cause of essential tremor. Am J Hum  
640 Genet. 2012;91(2):313-9. Epub 2012/08/07. doi: 10.1016/j.ajhg.2012.07.002. PubMed  
641 PMID: 22863194; PubMed Central PMCID: PMC3415547.
- 642 12. Hor H, Francescato L, Bartesaghi L, Ortega-Cubero S, Kousi M, Lorenzo-  
643 Betancor O, et al. Missense mutations in TENM4, a regulator of axon guidance and  
644 central myelination, cause essential tremor. Hum Mol Genet. 2015;24(20):5677-86.  
645 Epub 2015/07/19. doi: 10.1093/hmg/ddv281. PubMed PMID: 26188006; PubMed  
646 Central PMCID: PMC4692992.
- 647 13. Sanchez E, Bergareche A, Krebs CE, Gorostidi A, Makarov V, Ruiz-Martinez J,  
648 et al. SORT1 Mutation Resulting in Sortilin Deficiency and p75(NTR) Upregulation in a  
649 Family With Essential Tremor. ASN Neuro. 2015;7(4). Epub 2015/08/25. doi:  
650 10.1177/1759091415598290. PubMed PMID: 26297037; PubMed Central PMCID:  
651 PMC4550298.
- 652 14. Bergareche A, Bednarz M, Sanchez E, Krebs CE, Ruiz-Martinez J, De La Riva P,  
653 et al. SCN4A pore mutation pathogenetically contributes to autosomal dominant  
654 essential tremor and may increase susceptibility to epilepsy. Hum Mol Genet.  
655 2015;24(24):7111-20. Epub 2015/10/03. doi: 10.1093/hmg/ddv410. PubMed PMID:  
656 26427606; PubMed Central PMCID: PMC4654061.
- 657 15. Liu X, Hernandez N, Kisselev S, Floratos A, Sawle A, Ionita-Laza I, et al.  
658 Identification of candidate genes for familial early-onset essential tremor. Eur J Hum  
659 Genet. 2016;24(7):1009-15. Epub 2015/10/29. doi: 10.1038/ejhg.2015.228. PubMed  
660 PMID: 26508575; PubMed Central PMCID: PMC5070884.

- 661 16. Gonzalez-Alegre P, Di Paola J, Wang K, Fabbro S, Yu HC, Shaikh TH, et al.  
662 Evaluating Familial Essential Tremor with Novel Genetic Approaches: Is it a Genotyping  
663 or Phenotyping Issue? Tremor and other hyperkinetic movements (New York, NY).  
664 2014;4:258. Epub 2014/11/07. doi: 10.7916/d8fb51g3. PubMed PMID: 25374765;  
665 PubMed Central PMCID: PMC4219111.
- 666 17. Meienberg J, Zerjavic K, Keller I, Okoniewski M, Patrignani A, Ludin K, et al. New  
667 insights into the performance of human whole-exome capture platforms. Nucleic Acids  
668 Res. 2015;43(11):e76. Epub 2015/03/31. doi: 10.1093/nar/gkv216. PubMed PMID:  
669 25820422; PubMed Central PMCID: PMC4477645.
- 670 18. Meienberg J, Bruggmann R, Oexle K, Matyas G. Clinical sequencing: is WGS the  
671 better WES? Hum Genet. 2016;135(3):359-62. Epub 2016/01/09. doi: 10.1007/s00439-  
672 015-1631-9. PubMed PMID: 26742503; PubMed Central PMCID: PMC4757617.
- 673 19. Liu DJ, Leal SM. A novel adaptive method for the analysis of next-generation  
674 sequencing data to detect complex trait associations with rare variants due to gene main  
675 effects and interactions. PLoS Genet. 2010;6(10):e1001156. Epub 2010/10/27. doi:  
676 10.1371/journal.pgen.1001156. PubMed PMID: 20976247; PubMed Central PMCID:  
677 PMC2954824.
- 678 20. Peterson LG, Grover J, Vilhjalmsson B, Christensen G, Scherer A, editors. A  
679 logistic mixed model approach to obtain a reduced model score for KBAC to adjust for  
680 population structure and relatedness between samples. Annual Meeting of American  
681 Society of Human Genetics; October 18-22, 2014 2014; San Diego, CA.
- 682 21. Louis ED, Ottman R, Ford B, Pullman S, Martinez M, Fahn S, et al. The  
683 Washington Heights-Inwood Genetic Study of Essential Tremor: methodologic issues in  
684 essential-tremor research. Neuroepidemiology. 1997;16(3):124-33. Epub 1997/01/01.  
685 PubMed PMID: 9159767.

- 686 22. Deuschl G, Bain P, Brin M. Consensus statement of the Movement Disorder  
687 Society on Tremor. Ad Hoc Scientific Committee. Movement disorders : official journal of  
688 the Movement Disorder Society. 1998;13 Suppl 3:2-23. Epub 1998/11/25. PubMed  
689 PMID: 9827589.
- 690 23. Bhatia KP, Bain P, Bajaj N, Elble RJ, Hallett M, Louis ED, et al. Consensus  
691 Statement on the classification of tremors, from the task force on tremor of the  
692 International Parkinson and Movement Disorder Society. Movement disorders : official  
693 journal of the Movement Disorder Society. 2017. Epub 2017/12/02. doi:  
694 10.1002/mds.27121. PubMed PMID: 29193359.
- 695 24. Li H, Durbin R. Fast and accurate short read alignment with Burrows-Wheeler  
696 transform. Bioinformatics. 2009;25(14):1754-60. Epub 2009/05/20. doi:  
697 10.1093/bioinformatics/btp324. PubMed PMID: 19451168; PubMed Central PMCID:  
698 PMCPMC2705234.
- 699 25. McKenna A, Hanna M, Banks E, Sivachenko A, Cibulskis K, Kernytsky A, et al.  
700 The Genome Analysis Toolkit: a MapReduce framework for analyzing next-generation  
701 DNA sequencing data. Genome Res. 2010;20(9):1297-303. Epub 2010/07/21. doi:  
702 10.1101/gr.107524.110. PubMed PMID: 20644199; PubMed Central PMCID:  
703 PMCPMC2928508.
- 704 26. Kircher M, Witten DM, Jain P, O'Roak BJ, Cooper GM, Shendure J. A general  
705 framework for estimating the relative pathogenicity of human genetic variants. Nat  
706 Genet. 2014;46(3):310-5. Epub 2014/02/04. doi: 10.1038/ng.2892. PubMed PMID:  
707 24487276; PubMed Central PMCID: PMCPMC3992975.
- 708 27. Kimura M. The neutral theory of molecular evolution. Cambridge and New York:  
709 Cambridge University Press; 1983.

- 710 28. Kumar P, Henikoff S, Ng PC. Predicting the effects of coding non-synonymous  
711 variants on protein function using the SIFT algorithm. *Nat Protoc.* 2009;4(7):1073-81.  
712 Epub 2009/06/30. doi: 10.1038/nprot.2009.86. PubMed PMID: 19561590.
- 713 29. Adzhubei IA, Schmidt S, Peshkin L, Ramensky VE, Gerasimova A, Bork P, et al.  
714 A method and server for predicting damaging missense mutations. *Nat Methods.*  
715 2010;7(4):248-9. Epub 2010/04/01. doi: 10.1038/nmeth0410-248. PubMed PMID:  
716 20354512; PubMed Central PMCID: PMCPMC2855889.
- 717 30. Chun S, Fay JC. Identification of deleterious mutations within three human  
718 genomes. *Genome Res.* 2009;19(9):1553-61. Epub 2009/07/16. doi:  
719 10.1101/gr.092619.109. PubMed PMID: 19602639; PubMed Central PMCID:  
720 PMCPMC2752137.
- 721 31. Schwarz JM, Rodelsperger C, Schuelke M, Seelow D. MutationTaster evaluates  
722 disease-causing potential of sequence alterations. *Nat Methods.* 2010;7(8):575-6. Epub  
723 2010/08/03. doi: 10.1038/nmeth0810-575. PubMed PMID: 20676075.
- 724 32. Shihab HA, Gough J, Cooper DN, Stenson PD, Barker GL, Edwards KJ, et al.  
725 Predicting the functional, molecular, and phenotypic consequences of amino acid  
726 substitutions using hidden Markov models. *Hum Mutat.* 2013;34(1):57-65. Epub  
727 2012/10/04. doi: 10.1002/humu.22225. PubMed PMID: 23033316; PubMed Central  
728 PMCID: PMCPMC3558800.
- 729 33. Choi Y, Chan AP. PROVEAN web server: a tool to predict the functional effect of  
730 amino acid substitutions and indels. *Bioinformatics.* 2015;31(16):2745-7. Epub  
731 2015/04/09. doi: 10.1093/bioinformatics/btv195. PubMed PMID: 25851949; PubMed  
732 Central PMCID: PMCPMC4528627.
- 733 34. Dong C, Wei P, Jian X, Gibbs R, Boerwinkle E, Wang K, et al. Comparison and  
734 integration of deleteriousness prediction methods for nonsynonymous SNVs in whole  
735 exome sequencing studies. *Hum Mol Genet.* 2015;24(8):2125-37. Epub 2015/01/02. doi:



- 736 10.1093/hmg/ddu733. PubMed PMID: 25552646; PubMed Central PMCID:  
737 PMCPMC4375422.
- 738 35. Fairbrother WG, Yeh RF, Sharp PA, Burge CB. Predictive identification of exonic  
739 splicing enhancers in human genes. *Science*. 2002;297(5583):1007-13. Epub  
740 2002/07/13. doi: 10.1126/science.1073774. PubMed PMID: 12114529.
- 741 36. Wang Z, Rolish ME, Yeo G, Tung V, Mawson M, Burge CB. Systematic  
742 identification and analysis of exonic splicing silencers. *Cell*. 2004;119(6):831-45. Epub  
743 2004/12/21. doi: 10.1016/j.cell.2004.11.010. PubMed PMID: 15607979.
- 744 37. Thurman RE, Rynes E, Humbert R, Vierstra J, Maurano MT, Haugen E, et al.  
745 The accessible chromatin landscape of the human genome. *Nature*. 2012;489(7414):75-  
746 82. Epub 2012/09/08. doi: 10.1038/nature11232. PubMed PMID: 22955617; PubMed  
747 Central PMCID: PMCPMC3721348.
- 748 38. Petrovski S, Wang Q, Heinzen EL, Allen AS, Goldstein DB. Genic intolerance to  
749 functional variation and the interpretation of personal genomes. *PLoS Genet*.  
750 2013;9(8):e1003709. Epub 2013/08/31. doi: 10.1371/journal.pgen.1003709. PubMed  
751 PMID: 23990802; PubMed Central PMCID: PMCPMC3749936.
- 752 39. Yang H, Robinson PN, Wang K. Phenolyzer: phenotype-based prioritization of  
753 candidate genes for human diseases. *Nat Methods*. 2015;12(9):841-3. Epub 2015/07/21.  
754 doi: 10.1038/nmeth.3484. PubMed PMID: 26192085; PubMed Central PMCID:  
755 PMCPMC4718403.
- 756 40. Crimella C, Baschiroto C, Arnoldi A, Tonelli A, Tenderini E, Airoidi G, et al.  
757 Mutations in the motor and stalk domains of KIF5A in spastic paraplegia type 10 and in  
758 axonal Charcot-Marie-Tooth type 2. *Clin Genet*. 2012;82(2):157-64. Epub 2011/06/01.  
759 doi: 10.1111/j.1399-0004.2011.01717.x. PubMed PMID: 21623771.
- 760 41. Sinha S, Schroeder MD, Unnerstall U, Gaul U, Siggia ED. Cross-species  
761 comparison significantly improves genome-wide prediction of cis-regulatory modules in

- 762 *Drosophila*. BMC Bioinformatics. 2004;5:129. Epub 2004/09/11. doi: 10.1186/1471-  
763 2105-5-129. PubMed PMID: 15357878; PubMed Central PMCID: PMCPMC521067.
- 764 42. Laird NM, Lange C. Family-based designs in the age of large-scale gene-  
765 association studies. Nat Rev Genet. 2006;7(5):385-94. Epub 2006/04/19. doi:  
766 10.1038/nrg1839. PubMed PMID: 16619052.
- 767 43. Bansal V, Libiger O, Torkamani A, Schork NJ. Statistical analysis strategies for  
768 association studies involving rare variants. Nat Rev Genet. 2010;11(11):773-85. Epub  
769 2010/10/14. doi: 10.1038/nrg2867. PubMed PMID: 20940738; PubMed Central PMCID:  
770 PMCPMC3743540.
- 771 44. Belkadi A, Bolze A, Itan Y, Cobat A, Vincent QB, Antipenko A, et al. Whole-  
772 genome sequencing is more powerful than whole-exome sequencing for detecting  
773 exome variants. Proceedings of the National Academy of Sciences of the United States  
774 of America. 2015;112(17):5473-8. Epub 2015/04/02. doi: 10.1073/pnas.1418631112.  
775 PubMed PMID: 25827230; PubMed Central PMCID: PMCPMC4418901.
- 776 45. Hu H, Roach JC, Coon H, Guthery SL, Voelkerding KV, Margraf RL, et al. A  
777 unified test of linkage analysis and rare-variant association for analysis of pedigree  
778 sequence data. Nature biotechnology. 2014;32(7):663-9. Epub 2014/05/20. doi:  
779 10.1038/nbt.2895. PubMed PMID: 24837662; PubMed Central PMCID:  
780 PMCPMC4157619.
- 781 46. Calhoun JD, Hawkins NA, Zachwieja NJ, Kearney JA. Cacna1g is a genetic  
782 modifier of epilepsy caused by mutation of voltage-gated sodium channel Scn2a.  
783 Epilepsia. 2016;57(6):e103-7. Epub 2016/04/27. doi: 10.1111/epi.13390. PubMed PMID:  
784 27112236; PubMed Central PMCID: PMCPMC4985168.
- 785 47. Kim CH. Cav3.1 T-type calcium channel modulates the epileptogenicity of  
786 hippocampal seizures in the kainic acid-induced temporal lobe epilepsy model. Brain

787 Res. 2015;1622:204-16. Epub 2015/06/27. doi: 10.1016/j.brainres.2015.06.015. PubMed  
788 PMID: 26111648.

789 48. Coutelier M, Blesneac I, Monteil A, Monin ML, Ando K, Mundwiller E, et al. A  
790 Recurrent Mutation in CACNA1G Alters Cav3.1 T-Type Calcium-Channel Conduction  
791 and Causes Autosomal-Dominant Cerebellar Ataxia. *Am J Hum Genet.* 2015;97(5):726-  
792 37. Epub 2015/10/13. doi: 10.1016/j.ajhg.2015.09.007. PubMed PMID: 26456284;  
793 PubMed Central PMCID: PMC4667105.

794 49. Morino H, Matsuda Y, Muguruma K, Miyamoto R, Ohsawa R, Ohtake T, et al. A  
795 mutation in the low voltage-gated calcium channel CACNA1G alters the physiological  
796 properties of the channel, causing spinocerebellar ataxia. *Mol Brain.* 2015;8:89. Epub  
797 2015/12/31. doi: 10.1186/s13041-015-0180-4. PubMed PMID: 26715324; PubMed  
798 Central PMCID: PMC4693440.

799 50. Kimura M, Yabe I, Hama Y, Eguchi K, Ura S, Tsuzaka K, et al. SCA42 mutation  
800 analysis in a case series of Japanese patients with spinocerebellar ataxia. *J Hum Genet.*  
801 2017. Epub 2017/05/12. doi: 10.1038/jhg.2017.51. PubMed PMID: 28490766.

802 51. Choe M, Cortes E, Vonsattel JP, Kuo SH, Faust PL, Louis ED. Purkinje cell loss  
803 in essential tremor: Random sampling quantification and nearest neighbor analysis.  
804 *Movement disorders : official journal of the Movement Disorder Society.* 2016;31(3):393-  
805 401. Epub 2016/02/11. doi: 10.1002/mds.26490. PubMed PMID: 26861543; PubMed  
806 Central PMCID: PMC4783222.

807 52. Park YG, Choi JH, Lee C, Kim S, Kim Y, Chang KY, et al. Heterogeneity of  
808 tremor mechanisms assessed by tremor-related cortical potential in mice. *Mol Brain.*  
809 2015;8:3. Epub 2015/01/16. doi: 10.1186/s13041-015-0093-2. PubMed PMID:  
810 25588467; PubMed Central PMCID: PMC4304607.

- 811 53. Llinas RR. The intrinsic electrophysiological properties of mammalian neurons:  
812 insights into central nervous system function. *Science*. 1988;242(4886):1654-64. Epub  
813 1988/12/23. PubMed PMID: 3059497.
- 814 54. Perez-Reyes E. Molecular physiology of low-voltage-activated t-type calcium  
815 channels. *Physiol Rev*. 2003;83(1):117-61. Epub 2002/12/31. doi:  
816 10.1152/physrev.00018.2002. PubMed PMID: 12506128.
- 817 55. Sarnthein J, Jeanmonod D. High thalamocortical theta coherence in patients with  
818 Parkinson's disease. *J Neurosci*. 2007;27(1):124-31. Epub 2007/01/05. doi:  
819 10.1523/jneurosci.2411-06.2007. PubMed PMID: 17202479.
- 820 56. Filip P, Lungu OV, Manto MU, Bares M. Linking Essential Tremor to the  
821 Cerebellum: Physiological Evidence. *Cerebellum*. 2016;15(6):774-80. Epub 2015/11/05.  
822 doi: 10.1007/s12311-015-0740-2. PubMed PMID: 26530223.
- 823 57. Sinton CM, Krosser BI, Walton KD, Llinas RR. The effectiveness of different  
824 isomers of octanol as blockers of harmaline-induced tremor. *Pflugers Arch*.  
825 1989;414(1):31-6. Epub 1989/05/01. PubMed PMID: 2542888.
- 826 58. Handforth A. Harmaline tremor: underlying mechanisms in a potential animal  
827 model of essential tremor. *Tremor and other hyperkinetic movements (New York, NY)*.  
828 2012;2. Epub 2013/02/27. doi: 10.7916/d8td9w2p. PubMed PMID: 23440018; PubMed  
829 Central PMCID: PMC3572699.
- 830 59. Ueda A, Wu CF. Distinct frequency-dependent regulation of nerve terminal  
831 excitability and synaptic transmission by IA and IK potassium channels revealed by  
832 *Drosophila* Shaker and Shab mutations. *J Neurosci*. 2006;26(23):6238-48. Epub  
833 2006/06/10. doi: 10.1523/jneurosci.0862-06.2006. PubMed PMID: 16763031.
- 834 60. Leng XR, Qi XH, Zhou YT, Wang YP. Gain-of-function mutation p.Arg225Cys in  
835 SCN11A causes familial episodic pain and contributes to essential tremor. *J Hum Genet*.

836 2017;62(6):641-6. Epub 2017/03/17. doi: 10.1038/jhg.2017.21. PubMed PMID:  
837 28298626.

838 61. Lin L, Lesnick TG, Maraganore DM, Isacson O. Axon guidance and synaptic  
839 maintenance: preclinical markers for neurodegenerative disease and therapeutics.  
840 Trends Neurosci. 2009;32(3):142-9. Epub 2009/01/24. doi: 10.1016/j.tins.2008.11.006.  
841 PubMed PMID: 19162339; PubMed Central PMCID: PMCPMC2954610.

842 62. Carr L, Parkinson DB, Dun XP. Expression patterns of Slit and Robo family  
843 members in adult mouse spinal cord and peripheral nervous system. PLoS One.  
844 2017;12(2):e0172736. Epub 2017/02/25. doi: 10.1371/journal.pone.0172736. PubMed  
845 PMID: 28234971; PubMed Central PMCID: PMCPMC5325304.

846 63. McLaughlin HM, Sakaguchi R, Liu C, Igarashi T, Pehlivan D, Chu K, et al.  
847 Compound heterozygosity for loss-of-function lysyl-tRNA synthetase mutations in a  
848 patient with peripheral neuropathy. Am J Hum Genet. 2010;87(4):560-6. Epub  
849 2010/10/06. doi: 10.1016/j.ajhg.2010.09.008. PubMed PMID: 20920668; PubMed  
850 Central PMCID: PMCPMC2948804.

851 64. Saifee TA, Schwingenschuh P, Reilly MM, Lunn MP, Katschnig P, Kassavetis P,  
852 et al. Tremor in inflammatory neuropathies. J Neurol Neurosurg Psychiatry.  
853 2013;84(11):1282-7. Epub 2012/09/07. doi: 10.1136/jnnp-2012-303013. PubMed PMID:  
854 22952325.

855 65. Mak AC, Lai YY, Lam ET, Kwok TP, Leung AK, Poon A, et al. Genome-Wide  
856 Structural Variation Detection by Genome Mapping on Nanochannel Arrays. Genetics.  
857 2016;202(1):351-62. Epub 2015/10/30. doi: 10.1534/genetics.115.183483. PubMed  
858 PMID: 26510793; PubMed Central PMCID: PMCPMC4701098.

859  
860

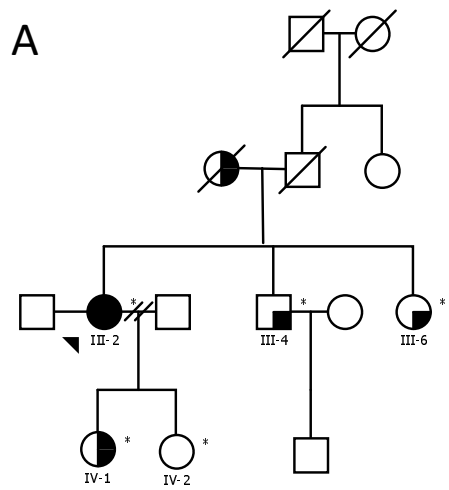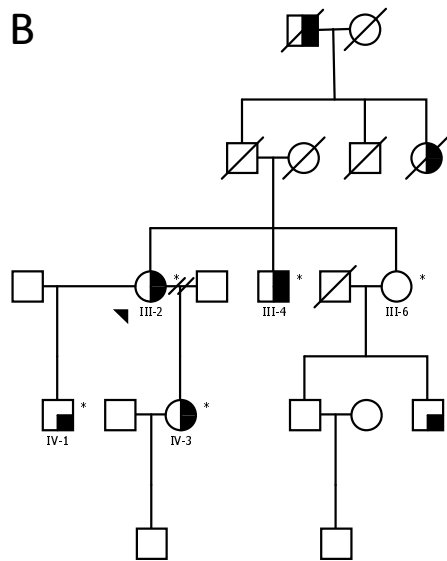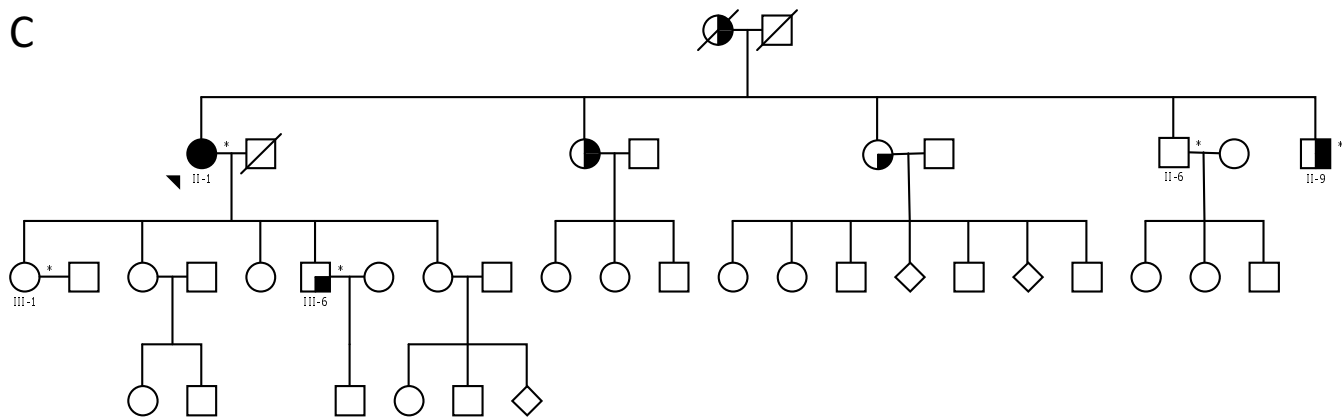

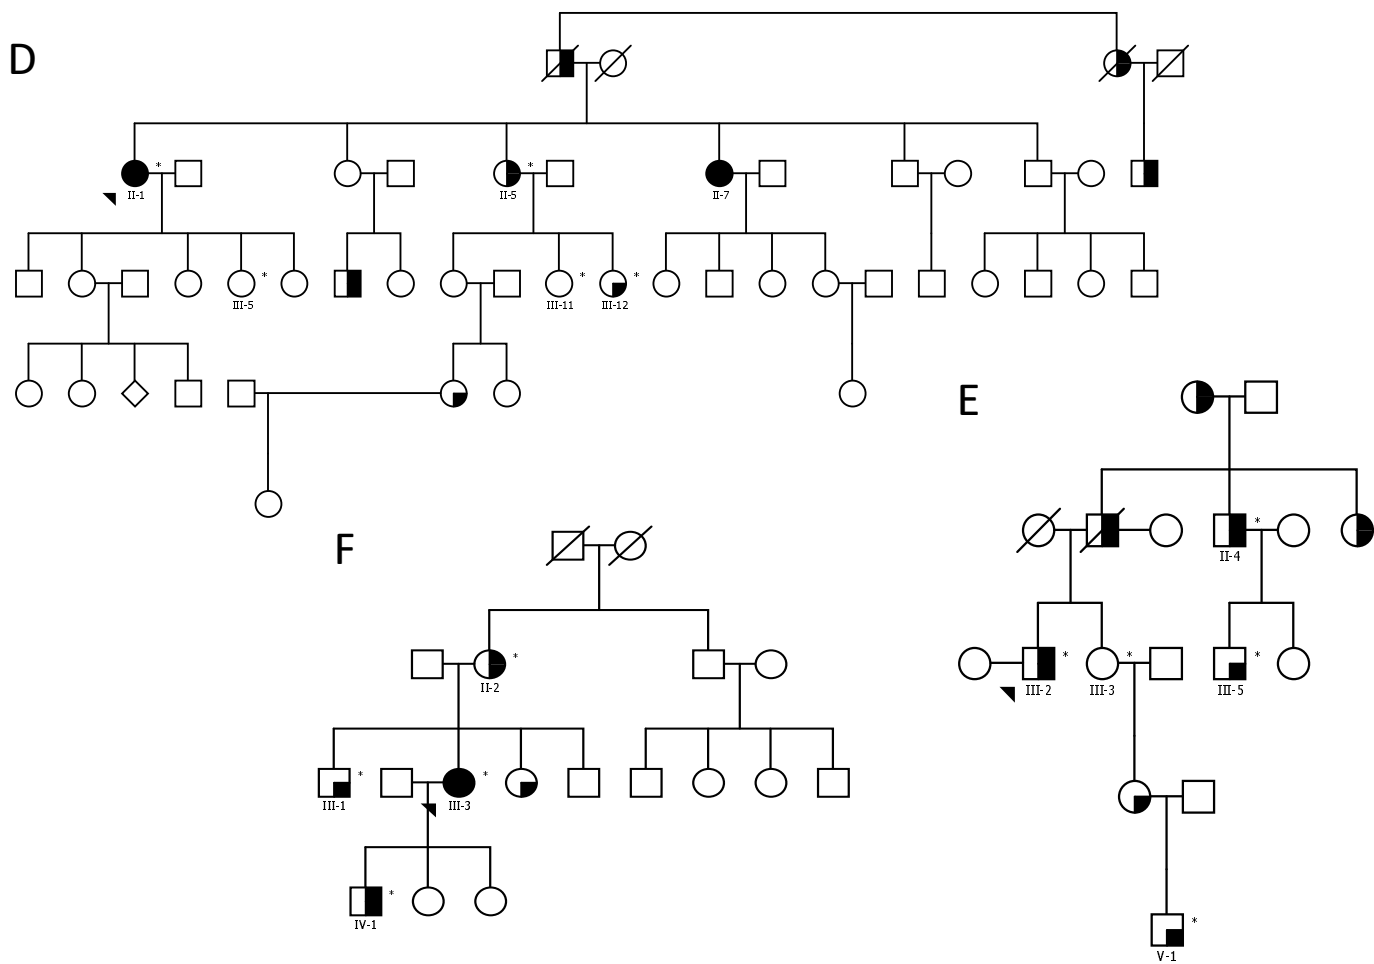

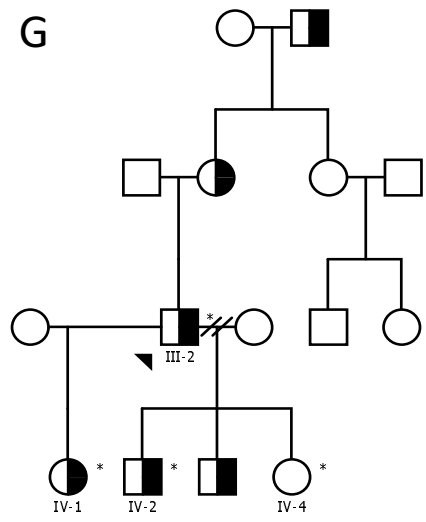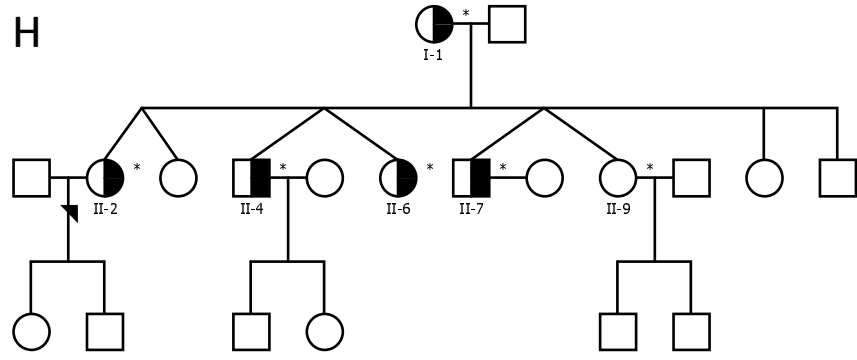



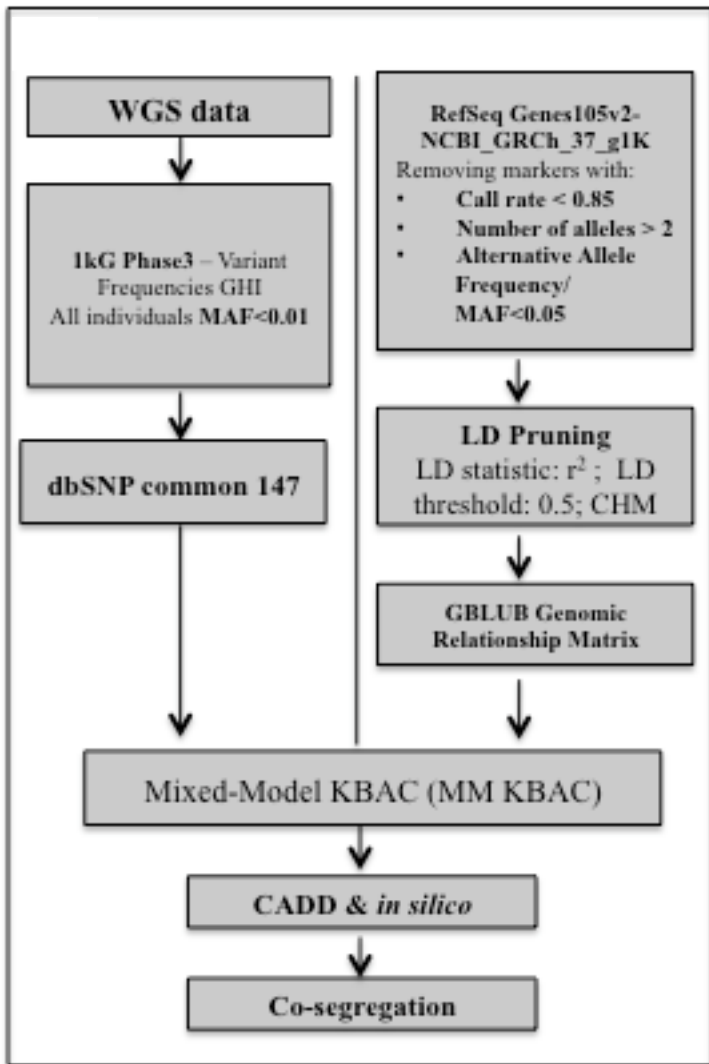

Source: http://biorxiv.org/content/10.1101/248443v1.full.pdf
